# Supplementary material
Source: PubMed Central journal article supplement (PMC5528643)
Supplement: MOL2-8-741-s003.pdf [file MOL2-8-741-s003.pdf]

**Supplementary Table S1****Patient characteristics by ER status in the Uppsala cohort (n= 249, missing: 4)**

| Characteristic             | ER positive<br>n (%) | ER negative<br>n (%) |
|----------------------------|----------------------|----------------------|
|                            | 215 (86)             | 34 (14)              |
| PR                         |                      |                      |
| Positive                   | 203 (94)             | 23 (68)              |
| Negative                   | 12 (6)               | 11 (32)              |
| Mean age                   | 62                   | 62                   |
| Tumour size                |                      |                      |
| <20 mm                     | 100 (47)             | 11 (36)              |
| ≥20 mm                     | 115 (53)             | 23 (64)              |
| Elston grade               |                      |                      |
| I                          | 63 (30)              | 2 (6)                |
| II                         | 116 (54)             | 11 (32)              |
| III                        | 34 (16)              | 21 (62)              |
| Missing cases: 2           |                      |                      |
| Nodal status               |                      |                      |
| Negative                   | 137 (66)             | 20 (62)              |
| Positive                   | 72 (34)              | 12 (38)              |
| Missing cases: 8           |                      |                      |
| Systemic adjuvant therapy* |                      |                      |
| None                       | 120 (56)             | 21 (62)              |
| Endocrine                  | 69 (32)              | 10 (29)              |
| Chemotherapy               | 21 (10)              | 3 (9)                |
| Both                       | 4 (2)                | 0 (0)                |
| Missing cases: 6           |                      |                      |
| Ki67                       |                      |                      |
| <10%                       | 96 (49)              | 6 (18)               |
| ≥10%                       | 100 (51)             | 27 (82)              |
| Missing cases: 20          |                      |                      |
| PAM50 subtype              |                      |                      |
| Basal                      | 20 (9)               | 16 (47)              |
| <i>ERBB2</i>               | 26 (12)              | 15 (44)              |
| Luminal A                  | 75 (35)              | 2 (6)                |
| Luminal B                  | 52 (24)              | 0 (0)                |
| Normal-like                | 42 (20)              | 1 (3)                |

\*Endocrine or Chemotherapy refers to each treatment alone or in combination with radiotherapy.
