# Supplementary material
Source: PubMed Central journal article supplement (PMC5528643)
Supplement: MOL2-8-741-s004.pdf [file MOL2-8-741-s004.pdf]

**Supplementary Table S10****Patient characteristics by ER status in the Stockholm cohort (n= 159)**

| Characteristic             | ER positive<br>n (%) | ER negative<br>n (%) |
|----------------------------|----------------------|----------------------|
|                            | 130 (82)             | 29 (18)              |
| PR                         |                      |                      |
| Positive                   | 108 (83)             | 6 (21)               |
| Negative                   | 22 (17)              | 23 (79)              |
| Mean age                   | 54                   | 59                   |
| Tumour size                |                      |                      |
| <20 mm                     | 51 (40)              | 13 (46)              |
| ≥20 mm                     | 78 (60)              | 15 (54)              |
| Missing cases: 2           |                      |                      |
| Elston grade               |                      |                      |
| I                          | 28 (23)              | 0 (0)                |
| II                         | 53 (43)              | 5 (20)               |
| III                        | 41 (34)              | 20 (80)              |
| Missing cases: 12          |                      |                      |
| Nodal status               |                      |                      |
| Negative                   | 73 (58)              | 21 (72)              |
| Positive                   | 52 (42)              | 8 (28)               |
| Missing cases: 5           |                      |                      |
| Systemic adjuvant therapy* |                      |                      |
| None                       | 17 (13)              | 16 (55)              |
| Endocrine                  | 87 (67)              | 9 (31)               |
| Chemotherapy               | 8 (6)                | 4 (14)               |
| Both                       | 18 (14)              | 0 (0)                |
| Ki67                       |                      |                      |
| <8%                        | 39 (41)              | 3 (16)               |
| ≥8%                        | 55 (59)              | 16 (84)              |
| Missing cases: 46          |                      |                      |
| PAM50 subtype              |                      |                      |
| Basal                      | 5 (4)                | 14 (48)              |
| <i>ERBB2</i>               | 12 (9)               | 6 (21)               |
| Luminal A                  | 51 (39)              | 1 (4)                |
| Luminal B                  | 45 (35)              | 3 (10)               |
| Normal-like                | 17 (13)              | 5 (17)               |

\*Endocrine or Chemotherapy refers to each treatment alone or in combination with radiotherapy, Both refers to a combination of endocrine treatment and chemotherapy.
