# Supplementary material
Source: PubMed Central journal article supplement (PMC5528643)
Supplement: MOL2-8-741-s005.pdf [file MOL2-8-741-s005.pdf]

**Supplementary Table S11****Patient characteristics by Ki67 status in the Stockholm cohort (n= 113, missing: 46)**

| Characteristic             | Ki67 <8%<br>n (%) | Ki67 ≥8%<br>n (%) |
|----------------------------|-------------------|-------------------|
| ER                         | 42 (37)           | 71 (63)           |
| Positive                   | 39 (93)           | 55 (77)           |
| Negative                   | 3 (7)             | 16 (23)           |
| PR                         |                   |                   |
| Positive                   | 32 (76)           | 49 (69)           |
| Negative                   | 10 (24)           | 22 (31)           |
| Mean age                   | 58                | 58                |
| Tumour size                |                   |                   |
| <20 mm                     | 17 (40)           | 30 (43)           |
| ≥20 mm                     | 25 (60)           | 40 (57)           |
| Missing cases: 1           |                   |                   |
| Elston grade               |                   |                   |
| I                          | 18 (45)           | 7 (10)            |
| II                         | 21 (53)           | 26 (38)           |
| III                        | 1 (2)             | 35 (52)           |
| Missing cases: 5           |                   |                   |
| Nodal status               |                   |                   |
| Negative                   | 24 (57)           | 43 (61)           |
| Positive                   | 18 (43)           | 28 (39)           |
| Systemic adjuvant therapy* |                   |                   |
| None                       | 5 (12)            | 19 (27)           |
| Endocrine                  | 32 (76)           | 38 (54)           |
| Chemotherapy               | 1 (2)             | 6 (8)             |
| Both                       | 4 (10)            | 8 (11)            |
| PAM50 subtype              |                   |                   |
| Basal                      | 2 (5)             | 10 (14)           |
| <i>ERBB2</i>               | 1 (2)             | 8 (11)            |
| Luminal A                  | 27 (64)           | 15 (21)           |
| Luminal B                  | 4 (10)            | 29 (41)           |
| Normal-like                | 8 (19)            | 9 (13)            |

\*Endocrine or Chemotherapy refers to each treatment alone or in combination with radiotherapy, Both refers to a combination of endocrine treatment and chemotherapy.
