# Supplementary material
Source: PubMed Central journal article supplement (PMC5528643)
Supplement: MOL2-8-741-s006.pdf [file MOL2-8-741-s006.pdf]

**Supplementary Table S12****Kaplan-Meier pairwise comparisons, Stockholm cohort****P-values (log-rank test)****Recurrence score**

|              | Low   | Intermediate | High  |
|--------------|-------|--------------|-------|
| Low          | -     | 0.265        | 0.002 |
| Intermediate | 0.265 | -            | 0.161 |
| High         | 0.002 | 0.161        | -     |

**Molecular subtype (Sorlie)**

|             | Normal-like | Luminal A | Luminal B | Basal | HER2-like |
|-------------|-------------|-----------|-----------|-------|-----------|
| Normal-like | -           | 0.366     | 0.006     | 0.074 | 0.003     |
| Luminal A   | 0.366       | -         | 0.014     | 0.170 | 0.003     |
| Luminal B   | 0.006       | 0.014     | -         | 0.536 | 0.433     |
| Basal       | 0.074       | 0.170     | 0.536     | -     | 0.261     |
| HER2-like   | 0.003       | 0.003     | 0.433     | 0.261 | -         |

**Molecular subtype (Hu)**

|             | Normal-like | Luminal A | Luminal B | Basal | HER2-like |
|-------------|-------------|-----------|-----------|-------|-----------|
| Normal-like | -           | 0.934     | 0.006     | 0.121 | 0.002     |
| Luminal A   | 0.934       | -         | <0.001    | 0.037 | <0.001    |
| Luminal B   | 0.006       | <0.001    | -         | 0.270 | 0.376     |
| Basal       | 0.121       | 0.037     | 0.270     | -     | 0.082     |
| HER2-like   | 0.002       | <0.001    | 0.376     | 0.082 | -         |

**Molecular subtype (Parker)**

|             | Normal-like | Luminal A | Luminal B | Basal | HER2-like |
|-------------|-------------|-----------|-----------|-------|-----------|
| Normal-like | -           | 0.997     | 0.007     | 0.063 | 0.023     |
| Luminal A   | 0.997       | -         | <0.001    | 0.007 | 0.001     |
| Luminal B   | 0.007       | <0.001    | -         | 0.632 | 0.871     |
| Basal       | 0.063       | 0.007     | 0.632     | -     | 0.612     |
| HER2-like   | 0.023       | 0.001     | 0.871     | 0.612 | -         |
