# Supplementary material
Source: PubMed Central journal article supplement (PMC5528643)
Supplement: MOL2-8-741-s007.pdf [file MOL2-8-741-s007.pdf]

Supplementary Table S13

Paired gene signature and signature specific Ki67 prognostic classifications for each patient of the Stockholm cohort (0=Good, 1= Poor Prognosis)

| Patient ID | GGI | 70-gene | p53 | RS* | Sorlie <sup>‡</sup> | Hu <sup>‡</sup> | Parker <sup>‡</sup> | Ki8 <sup>§</sup> | Ki10 <sup>§</sup> | Ki18 <sup>§</sup> | Ki20 <sup>§</sup> | Ki27 <sup>§</sup> | Ki28 <sup>§</sup> | % Good Prognosis | % Poor Prognosis | Overall Prognostic Risk |
|------------|-----|---------|-----|-----|---------------------|-----------------|---------------------|------------------|-------------------|-------------------|-------------------|-------------------|-------------------|------------------|------------------|-------------------------|
| 003Wi      | 1   | 1       | 0   | 1   | 0                   | 1               | 1                   | 1                | 1                 | 0                 | 0                 | 0                 | 0                 | 46               | 54               | Poor                    |
| 005Jo      | 0   | 0       | 0   | 1   | 0                   | 0               | 1                   | 1                | 1                 | 0                 | 0                 | 0                 | 0                 | 69               | 31               | Good                    |
| 014Er      | 1   | 1       | 1   | 1   | 1                   | 1               | 1                   | 1                | 1                 | 1                 | 1                 | 1                 | 1                 | 0                | 100              | Poor                    |
| 018Gu      | 0   | 0       | 0   | 0   | 0                   | 0               | 0                   | 0                | 0                 | 0                 | 0                 | 0                 | 0                 | 100              | 0                | Good                    |
| 019Er      | 0   | 0       | 0   | 0   | 0                   | 0               | 0                   | 0                | 0                 | 0                 | 0                 | 0                 | 0                 | 100              | 0                | Good                    |
| 026Na      | 0   | 0       | 0   | 0   | 0                   | 0               | 0                   | 0                | 0                 | 0                 | 0                 | 0                 | 0                 | 100              | 0                | Good                    |
| 027Jo      | 0   | 1       | 0   | 1   | 1                   | 1               | 1                   | 1                | 1                 | 0                 | 0                 | 0                 | 0                 | 46               | 54               | Poor                    |
| 028Ja      | 0   | 0       | 0   | 0   | 0                   | 0               | 0                   | 1                | 1                 | 0                 | 0                 | 0                 | 0                 | 85               | 15               | Good                    |
| 031Er      | 0   | 0       | 0   | 0   | 0                   | 0               | 0                   | 0                | 0                 | 0                 | 0                 | 0                 | 0                 | 100              | 0                | Good                    |
| 035Si      | 0   | 0       | 0   | 0   | 0                   | 0               | 0                   | 1                | 1                 | 0                 | 0                 | 0                 | 0                 | 85               | 15               | Good                    |
| 036Ar      | 1   | 1       | 1   | 1   | 1                   | 1               | 1                   | 1                | 1                 | 1                 | 1                 | 1                 | 1                 | 0                | 100              | Poor                    |
| 040Th      | 1   | 1       | 0   | 1   | 1                   | 1               | 1                   | 1                | 1                 | 1                 | 1                 | 1                 | 1                 | 8                | 92               | Poor                    |
| 041La      | 0   | 0       | 0   | 0   | 0                   | 0               | 0                   | 0                | 0                 | 0                 | 0                 | 0                 | 0                 | 100              | 0                | Good                    |
| 045Ol      | 1   | 1       | 1   | 1   | 1                   | 1               | 1                   | 1                | 1                 | 0                 | 0                 | 0                 | 0                 | 31               | 69               | Poor                    |
| 052Za      | 1   | 1       | 0   | 1   | 1                   | 1               | 1                   | 1                | 1                 | 0                 | 0                 | 0                 | 0                 | 38               | 62               | Poor                    |
| 055Sv      | 1   | 1       | 0   | 0   | 0                   | 1               | 1                   | 1                | 1                 | 1                 | 1                 | 1                 | 1                 | 23               | 77               | Poor                    |
| 059Ho      | 0   | 1       | 0   | 1   | -                   | 0               | 0                   | 1                | 1                 | 0                 | 0                 | 0                 | 0                 | 69               | 31               | Good                    |
| 063Pe      | 0   | 1       | 0   | 0   | 0                   | 0               | 1                   | 1                | 1                 | 0                 | 0                 | 0                 | 0                 | 69               | 31               | Good                    |
| 069Ek      | 1   | 1       | 1   | 1   | 1                   | 1               | 1                   | 1                | 1                 | 1                 | 1                 | 1                 | 1                 | 0                | 100              | Poor                    |
| 071Av      | 1   | 1       | 0   | 1   | 0                   | 1               | 1                   | 1                | 1                 | 1                 | 1                 | 1                 | 1                 | 15               | 85               | Poor                    |
| 072Te      | 1   | 1       | 0   | 1   | 0                   | 1               | 1                   | 1                | 1                 | 1                 | 1                 | 1                 | 1                 | 15               | 85               | Poor                    |
| 076Er      | 0   | 0       | 0   | 0   | 0                   | 0               | 1                   | 1                | 1                 | 0                 | 0                 | 0                 | 0                 | 77               | 23               | Good                    |
| 081Ul      | 0   | 1       | 0   | 1   | 0                   | 0               | 0                   | 1                | 1                 | 0                 | 0                 | 0                 | 0                 | 69               | 31               | Good                    |
| 085Ry      | 0   | 0       | 0   | 0   | 0                   | 0               | 0                   | 0                | 0                 | 0                 | 0                 | 0                 | 0                 | 100              | 0                | Good                    |

|       |   |   |   |   |   |   |   |   |   |   |   |   |   |     |     |      |
|-------|---|---|---|---|---|---|---|---|---|---|---|---|---|-----|-----|------|
| 086Li | 0 | 0 | 0 | 0 | 0 | 0 | 0 | 0 | 0 | 0 | 0 | 0 | 0 | 100 | 0   | Good |
| 087Bu | 0 | 0 | 0 | 0 | 0 | 0 | 0 | 0 | 0 | 0 | 0 | 0 | 0 | 100 | 0   | Good |
| 089Ho | 1 | 1 | 0 | 1 | 0 | 1 | 1 | 1 | 1 | 0 | 0 | 0 | 0 | 46  | 54  | Poor |
| 092No | 0 | 1 | 0 | 0 | 0 | 0 | 0 | 0 | 0 | 0 | 0 | 0 | 0 | 92  | 8   | Good |
| 101Gl | 0 | 0 | 0 | 0 | 0 | 0 | 1 | 1 | 1 | 1 | 1 | 0 | 0 | 62  | 38  | Good |
| 112Fr | 0 | 0 | 0 | 0 | 0 | 0 | 0 | 1 | 1 | 1 | 1 | 0 | 0 | 69  | 31  | Good |
| 113So | 1 | 1 | 1 | 1 | 1 | 1 | 1 | 0 | 0 | 0 | 0 | 0 | 0 | 46  | 54  | Poor |
| 117Ko | 1 | 1 | 0 | 1 | 1 | 1 | 1 | 1 | 0 | 0 | 0 | 0 | 0 | 46  | 54  | Poor |
| 121Le | 0 | 0 | 0 | 0 | 0 | 0 | 0 | 0 | 0 | 0 | 0 | 0 | 0 | 100 | 0   | Good |
| 123Er | 0 | 0 | 0 | 0 | 0 | 0 | 0 | 0 | 0 | 0 | 0 | 0 | 0 | 100 | 0   | Good |
| 125Wa | 1 | 0 | 0 | 1 | 1 | 1 | 1 | 0 | 0 | 0 | 0 | 0 | 0 | 62  | 38  | Good |
| 126As | 0 | 0 | 0 | 0 | 0 | 0 | 0 | 1 | 1 | 0 | 0 | 0 | 0 | 85  | 15  | Good |
| 128Sa | 1 | 1 | 1 | 1 | 1 | 1 | 1 | 0 | 0 | 0 | 0 | 0 | 0 | 46  | 54  | Poor |
| 132Vi | 0 | 0 | 0 | 0 | 0 | 0 | 0 | 1 | 1 | 1 | 1 | 1 | 1 | 54  | 46  | Good |
| 136Er | 0 | 0 | 0 | 0 | 0 | 0 | 0 | 0 | 0 | 0 | 0 | 0 | 0 | 100 | 0   | Good |
| 142Sw | 1 | 0 | 0 | 1 | 0 | 1 | 1 | 1 | 1 | 1 | 1 | 1 | 0 | 31  | 69  | Poor |
| 146Ho | 0 | 0 | 0 | 1 | - | 0 | 0 | 0 | 0 | 0 | 0 | 0 | 0 | 92  | 8   | Good |
| 157Ha | 0 | 0 | 0 | 0 | 0 | 0 | 0 | 1 | 1 | 0 | 0 | 0 | 0 | 85  | 15  | Good |
| 158Ku | 0 | 0 | 0 | 0 | 0 | 0 | 0 | 0 | 0 | 0 | 0 | 0 | 0 | 100 | 0   | Good |
| 160Lu | 0 | 0 | 0 | 0 | 0 | 0 | 0 | 0 | 0 | 0 | 0 | 0 | 0 | 100 | 0   | Good |
| 161Jo | 1 | 1 | 1 | 1 | 1 | 1 | 1 | 1 | 1 | 1 | 1 | 1 | 1 | 0   | 100 | Poor |
| 164My | 0 | 0 | 0 | 0 | 0 | 0 | 0 | 0 | 0 | 0 | 0 | 0 | 0 | 100 | 0   | Good |
| 165An | 0 | 0 | 0 | 0 | 0 | 0 | 0 | 0 | 0 | 0 | 0 | 0 | 0 | 100 | 0   | Good |
| 166Jo | 1 | 1 | 1 | 1 | 1 | 1 | 1 | 1 | 0 | 0 | 0 | 0 | 0 | 38  | 62  | Poor |
| 170Fa | 1 | 1 | 1 | 1 | 1 | 1 | 1 | 1 | 1 | 1 | 1 | 1 | 1 | 0   | 100 | Poor |
| 171So | 1 | 1 | 0 | 1 | 0 | 1 | 1 | 1 | 1 | 1 | 0 | 0 | 0 | 38  | 62  | Poor |
| 172Sa | 0 | 0 | 0 | 0 | 0 | 0 | 0 | 0 | 0 | 0 | 0 | 0 | 0 | 100 | 0   | Good |

|       |   |   |   |   |   |   |   |   |   |   |   |   |   |     |     |      |
|-------|---|---|---|---|---|---|---|---|---|---|---|---|---|-----|-----|------|
| 174He | 0 | 1 | 0 | 1 | 0 | 0 | 0 | 1 | 0 | 0 | 0 | 0 | 0 | 77  | 23  | Good |
| 176Th | 0 | 1 | 1 | 1 | 1 | 0 | 0 | 0 | 0 | 0 | 0 | 0 | 0 | 69  | 31  | Good |
| 178Wa | 0 | 0 | 0 | 0 | 0 | 0 | 0 | 1 | 0 | 0 | 0 | 0 | 0 | 92  | 8   | Good |
| 183An | 1 | 1 | 1 | 1 | 1 | 1 | 1 | 0 | 0 | 0 | 0 | 0 | 0 | 46  | 54  | Poor |
| 185Ny | 1 | 1 | 0 | 1 | 1 | 1 | 1 | 1 | 1 | 1 | 1 | 1 | 0 | 15  | 85  | Poor |
| 187Ol | 1 | 1 | 1 | 1 | 1 | 1 | 1 | 1 | 1 | 1 | 1 | 1 | 1 | 0   | 100 | Poor |
| 188Ah | 1 | 1 | 1 | 1 | 1 | 1 | 1 | 1 | 1 | 1 | 1 | 1 | 1 | 0   | 100 | Poor |
| 192La | 1 | 1 | 1 | 1 | 1 | 1 | 1 | 1 | 1 | 1 | 1 | 1 | 1 | 0   | 100 | Poor |
| 196Sa | 0 | 0 | 0 | 1 | 0 | 0 | 0 | 1 | 1 | 1 | 1 | 1 | 1 | 46  | 54  | Poor |
| 199Po | 0 | 0 | 0 | 0 | 0 | 0 | 0 | 1 | 1 | 1 | 1 | 1 | 1 | 54  | 46  | Good |
| 202Ni | 0 | 0 | 0 | 0 | 0 | 0 | 0 | 0 | 0 | 0 | 0 | 0 | 0 | 100 | 0   | Good |
| 204Fa | 0 | 0 | 0 | 0 | - | 0 | 0 | 1 | 1 | 0 | 0 | 0 | 0 | 85  | 15  | Good |
| 206Ri | 0 | 0 | 0 | 0 | 0 | 0 | 0 | 1 | 1 | 1 | 0 | 0 | 0 | 77  | 23  | Good |
| 211Wa | 0 | 0 | 0 | 0 | 0 | 0 | 0 | 0 | 0 | 0 | 0 | 0 | 0 | 100 | 0   | Good |
| 215He | 0 | 1 | 0 | 1 | 0 | 1 | 0 | 0 | 0 | 0 | 0 | 0 | 0 | 77  | 23  | Good |
| 216An | 1 | 1 | 1 | 1 | 1 | 1 | 1 | 1 | 1 | 1 | 1 | 1 | 1 | 0   | 100 | Poor |
| 218Be | 0 | 0 | 0 | 1 | 0 | 0 | 0 | 1 | 0 | 0 | 0 | 0 | 0 | 85  | 15  | Good |
| 219Wo | 0 | 0 | 0 | 0 | 0 | 0 | 0 | 0 | 0 | 0 | 0 | 0 | 0 | 100 | 0   | Good |
| 221Lu | 1 | 1 | 0 | 1 | 1 | 1 | 1 | 1 | 1 | 0 | 0 | 0 | 0 | 38  | 62  | Poor |
| 223Li | 1 | 1 | 0 | 1 | 0 | 1 | 1 | 0 | 0 | 0 | 0 | 0 | 0 | 62  | 38  | Good |
| 229La | 0 | 0 | 0 | 0 | - | 0 | 0 | 0 | 0 | 0 | 0 | 0 | 0 | 100 | 0   | Good |
| 231Ca | 0 | 0 | 0 | 1 | 0 | 0 | 0 | 0 | 0 | 0 | 0 | 0 | 0 | 92  | 8   | Good |
| 240Sm | 0 | 0 | 0 | 0 | - | 0 | 0 | 0 | 0 | 0 | 0 | 0 | 0 | 100 | 0   | Good |
| 243Be | 0 | 0 | 0 | 0 | - | 0 | 0 | 1 | 1 | 1 | 1 | 0 | 0 | 69  | 31  | Good |
| 246Ta | 1 | 1 | 0 | 1 | 0 | 1 | 1 | 1 | 0 | 0 | 0 | 0 | 0 | 54  | 46  | Good |
| 249Lu | 0 | 1 | 0 | 0 | 0 | 0 | 0 | 1 | 0 | 0 | 0 | 0 | 0 | 85  | 15  | Good |
| 258Ve | 1 | 1 | 1 | 1 | 1 | 1 | 1 | 1 | 1 | 1 | 1 | 1 | 1 | 0   | 100 | Poor |

|       |   |   |   |   |   |   |   |   |   |   |   |   |   |     |     |      |
|-------|---|---|---|---|---|---|---|---|---|---|---|---|---|-----|-----|------|
| 260Li | 0 | 0 | 0 | 0 | 0 | 0 | 0 | 0 | 0 | 0 | 0 | 0 | 0 | 100 | 0   | Good |
| 261En | 0 | 0 | 0 | 0 | 0 | 0 | 0 | 0 | 0 | 0 | 0 | 0 | 0 | 100 | 0   | Good |
| 262Sp | 0 | 1 | 0 | 1 | 1 | 0 | 1 | 1 | 1 | 0 | 0 | 0 | 0 | 54  | 46  | Good |
| 264La | 0 | 0 | 0 | 0 | 0 | 0 | 0 | 1 | 1 | 1 | 1 | 0 | 0 | 69  | 31  | Good |
| 268Ar | 0 | 0 | 0 | 0 | 0 | 0 | 1 | 1 | 1 | 0 | 0 | 0 | 0 | 77  | 23  | Good |
| 275We | 1 | 1 | 0 | 1 | 1 | 1 | 1 | 1 | 1 | 1 | 1 | 1 | 1 | 8   | 92  | Poor |
| 276Ek | 1 | 0 | 0 | 0 | 0 | 0 | 1 | 0 | 0 | 0 | 0 | 0 | 0 | 85  | 15  | Good |
| 281Br | 0 | 0 | 0 | 0 | 0 | 0 | 0 | 1 | 1 | 1 | 1 | 1 | 0 | 62  | 38  | Good |
| 282Wi | 1 | 0 | 0 | 0 | 0 | 0 | 1 | 1 | 1 | 1 | 0 | 0 | 0 | 62  | 38  | Good |
| 283An | 0 | 0 | 0 | 1 | - | 0 | 0 | 1 | 1 | 1 | 1 | 0 | 0 | 62  | 38  | Good |
| 284Je | 0 | 0 | 0 | 0 | 0 | 0 | 0 | 0 | 0 | 0 | 0 | 0 | 0 | 100 | 0   | Good |
| 285Fl | 0 | 1 | 0 | 0 | 0 | 0 | 1 | 1 | 1 | 1 | 1 | 0 | 0 | 54  | 46  | Good |
| 296Ny | 1 | 1 | 1 | 1 | - | 1 | 1 | 1 | 1 | 1 | 1 | 1 | 1 | 8   | 92  | Poor |
| 297Pe | 0 | 0 | 0 | 0 | 0 | 0 | 0 | 0 | 0 | 0 | 0 | 0 | 0 | 100 | 0   | Good |
| 298La | 0 | 0 | 0 | 0 | 0 | 0 | 0 | 0 | 0 | 0 | 0 | 0 | 0 | 100 | 0   | Good |
| 307Eg | 0 | 0 | 0 | 0 | 0 | 0 | 0 | 0 | 0 | 0 | 0 | 0 | 0 | 100 | 0   | Good |
| 309Ev | 0 | 0 | 0 | 1 | 0 | 0 | 0 | 0 | 0 | 0 | 0 | 0 | 0 | 92  | 8   | Good |
| 310Wi | 0 | 0 | 0 | 0 | 0 | 0 | 0 | 1 | 1 | 0 | 0 | 0 | 0 | 85  | 15  | Good |
| 318Ki | 0 | 0 | 0 | 0 | 0 | 0 | 0 | 0 | 0 | 0 | 0 | 0 | 0 | 100 | 0   | Good |
| 319An | 1 | 1 | 1 | 1 | 1 | 1 | 1 | 1 | 1 | 1 | 1 | 1 | 1 | 0   | 100 | Poor |
| 327En | 1 | 1 | 1 | 1 | 1 | 1 | 1 | 1 | 1 | 1 | 1 | 1 | 1 | 0   | 100 | Poor |
| 331Ha | 1 | 1 | 0 | 1 | 0 | 1 | 1 | 1 | 0 | 0 | 0 | 0 | 0 | 54  | 46  | Good |
| 333Si | 0 | 0 | 0 | 0 | - | 0 | 0 | 1 | 1 | 0 | 0 | 0 | 0 | 85  | 15  | Good |
| 336Mo | 1 | 1 | 1 | 1 | 1 | 1 | 1 | 1 | 1 | 1 | 1 | 1 | 1 | 0   | 100 | Poor |
| 342Bl | 1 | 1 | 0 | 1 | 1 | 0 | 1 | 1 | 1 | 1 | 1 | 0 | 0 | 31  | 69  | Poor |
| 345Vi | 0 | 1 | 0 | 0 | 0 | 0 | 0 | 1 | 1 | 0 | 0 | 0 | 0 | 77  | 23  | Good |
| 347Ja | 1 | 1 | 1 | 1 | 1 | 1 | 1 | 1 | 1 | 0 | 0 | 0 | 0 | 31  | 69  | Poor |

|       |   |   |   |   |   |   |   |   |   |   |   |   |   |     |     |      |
|-------|---|---|---|---|---|---|---|---|---|---|---|---|---|-----|-----|------|
| 351Ol | 1 | 1 | 1 | 1 | 1 | 1 | 1 | 1 | 1 | 1 | 1 | 1 | 1 | 0   | 100 | Poor |
| 352An | 0 | 1 | 0 | 0 | 0 | 0 | 0 | 1 | 1 | 1 | 1 | 1 | 1 | 46  | 54  | Poor |
| 356Al | 1 | 1 | 1 | 1 | 1 | 1 | 1 | 1 | 1 | 0 | 0 | 0 | 0 | 31  | 69  | Poor |
| 365Ma | 1 | 1 | 0 | 1 | 1 | 1 | 1 | 0 | 0 | 0 | 0 | 0 | 0 | 54  | 46  | Good |
| 372Lu | 1 | 1 | 1 | 1 | 1 | 1 | 1 | 1 | 1 | 1 | 1 | 1 | 1 | 0   | 100 | Poor |
| 373Li | 1 | 1 | 1 | 1 | 1 | 1 | 1 | 1 | 1 | 1 | 1 | 1 | 1 | 0   | 100 | Poor |
| 379Ba | 0 | 0 | 0 | 0 | 0 | 0 | 0 | 0 | 0 | 0 | 0 | 0 | 0 | 100 | 0   | Good |
| 382Gu | 1 | 1 | 1 | 1 | 1 | 1 | 1 | 1 | 1 | 1 | 1 | 1 | 1 | 0   | 100 | Poor |

\* High recurrence score grouping; others as reference.

‡ Luminal B/HER2 or Basal subtype grouping; others as reference.

§Note: Each Ki67 cutoff is paired to a gene signature. E.g. Tumour 003Wi has a Ki67 value of 14% as defined on a whole-tumour section by a trained pathologist. For the purposes of our analysis GGI is paired with a ROC defined Ki67 cutoff of 18% in the Stockholm dataset. Thus, for the GGI-Ki67 pairing, Ki67 designates this sample as good prognosis (as it is *less than* 18%). In contrast, the 70-gene signature is paired with a ROC defined Ki67 cutoff of 8%, meaning for the 70-gene/Ki67 pairing, Ki67 designates the same sample as poor prognosis (as it is *greater than* 8%).
