# Supplementary material
Source: PubMed Central journal article supplement (PMC5528643)
Supplement: MOL2-8-741-s008.pdf [file MOL2-8-741-s008.pdf]

**Supplemental Table S14****Similarity in classification between Ki67 and prognostic gene signatures, Stockholm material**

| GGI               | Ki67 (%) |   |    |    |    |    |    |     | AUC  | Similarity |
|-------------------|----------|---|----|----|----|----|----|-----|------|------------|
|                   | <8       | 8 | 10 | 11 | 12 | 17 | 20 | >20 |      |            |
| Grade1            | 33       | 4 | 0  | 2  | 14 | 1  | 2  | 7   | 0.71 | 64 %       |
| Grade3            | 6        | 3 | 1  | 0  | 5  | 2  | 0  | 14  |      |            |
| 70-gene signature |          |   |    |    |    |    |    |     |      |            |
| Good              | 32       | 2 | 0  | 1  | 9  | 2  | 2  | 6   | 0.73 | 69 %       |
| Poor              | 7        | 5 | 1  | 1  | 10 | 1  | 0  | 15  |      |            |
| Recurrence score  |          |   |    |    |    |    |    |     |      |            |
| Low               | 18       | 1 | 0  | 1  | 7  | 2  | 2  | 6   | 0.66 | 64 %       |
| Intermediate      | 11       | 1 | 0  | 0  | 3  | 0  | 0  | 1   |      |            |
| High              | 10       | 5 | 1  | 1  | 9  | 1  | 0  | 14  |      |            |

Best signature-reproducing Ki67 cutoffs were identified with receiver operating characteristics (ROC). For recurrence score levels were grouped to most accurately reflect outcome similarities/ dissimilarities: high vs. intermediate/low. The area under the curve (AUC; from ROC-analysis) and similarity with best performing cut-off (indicated with dashed red line) for each gene classifier on the right.
