# Supplementary material
Source: PubMed Central journal article supplement (PMC5528643)
Supplement: MOL2-8-741-s009.pdf [file MOL2-8-741-s009.pdf]

**Supplementary Table S15**

**Ki67 vs. gene expression signatures in Cox bivariate analysis, BCSS endpoint, Stockholm**

| <b>Ki67 &gt;=</b> | <b>8</b>     | <b>10</b>    | <b>12</b>    | <b>17/18</b> | <b>20</b>    | <b>27</b>    | <b>28</b>    |
|-------------------|--------------|--------------|--------------|--------------|--------------|--------------|--------------|
| <b>SIGNATURE</b>  |              |              |              |              |              |              |              |
| GGI (HR)          | 2.85         | 3.41         | 3.49         | 3.43         | 3.17         | 3.22         | 3.25         |
| (95% CI)          | (1.21-6.75)  | (1.45-8.01)  | (1.49-8.16)  | (1.43-8.26)  | (1.33-7.55)  | (1.30-7.95)  | (1.32-7.95)  |
| Ki67 (HR)         | 2.08         | 1.24         | 1.17         | 1.17         | 1.47         | 1.34         | 1.34         |
| (95% CI)          | (0.73-5.90)  | (0.53-2.90)  | (0.51-2.66)  | (0.52-2.67)  | (0.65-3.33)  | (0.56-3.17)  | (0.56-3.19)  |
| 70-gene           | 3.7          | 4.43         | 4.54         | 4.3          | 4.1          | 4.11         | 4.2          |
|                   | (1.36-10.05) | (1.7-11.57)  | (1.74-11.81) | (1.67-11.07) | (1.58-10.61) | (1.56-10.83) | (1.58-11.16) |
| Ki67              | 1.75         | 1.16         | 1.09         | 1.31         | 1.5          | 1.42         | 1.31         |
|                   | (0.6-5.07)   | (0.5-2.69)   | (0.48-2.46)  | (0.6-2.86)   | (0.68-3.3)   | (0.63-3.2)   | (0.57-3.03)  |
| p53               | 1.28         | 1.4          | 1.41         | 1.28         | 1.15         | 0.99         | 0.92         |
|                   | (0.55-2.97)  | (0.6-3.27)   | (0.6-3.32)   | (0.53-3.11)  | (0.47-2.83)  | (0.38-2.62)  | (0.33-2.58)  |
| Ki67              | 3.05         | 1.75         | 1.61         | 1.82         | 2.2          | 2.45         | 2.57         |
|                   | (1.13-8.19)  | (0.77-4.0)   | (0.72-3.64)  | (0.81-4.08)  | (0.96-5.01)  | (0.99-6.05)  | (0.97-6.81)  |
| RS *              | 3.15         | 3.42         | 3.42         | 3.36         | 3.2          | 3.01         | 3.02         |
|                   | (1.08-9.18)  | (1.18-9.94)  | (1.18-9.96)  | (1.15-9.78)  | (1.1-9.37)   | (1.01-9.01)  | (1.01-9.06)  |
| Ki67              | 2.8          | 1.73         | 1.59         | 1.77         | 1.98         | 1.86         | 1.83         |
|                   | (1.05-7.45)  | (0.78-3.87)  | (0.73-3.49)  | (0.83-3.77)  | (0.93-4.25)  | (0.85-4.11)  | (0.82-4.1)   |
| RS §              | 4.62         | 5.33         | 5.43         | 5.28         | 5.04         | 5.1          | 5.13         |
|                   | (1.67-12.74) | (1.96-14.51) | (2.0-14.77)  | (1.94-14.40) | (1.84-13.84) | (1.83-14.18) | (1.85-14.25) |
| Ki67              | 1.92         | 1.23         | 1.15         | 1.26         | 1.43         | 1.33         | 1.32         |
|                   | (0.7-5.30)   | (0.54-2.81)  | (0.52-2.58)  | (0.58-2.74)  | (0.65-3.13)  | (0.59-2.99)  | (0.58-3.0)   |
| Sorlie ¥          | 3.26         | 3.83         | 3.89         | 3.99         | 3.8          | 4.11         | 4.26         |
|                   | (1.41-7.53)  | (1.64-8.96)  | (1.68-9.02)  | (1.69-9.43)  | (1.57-9.21)  | (1.68-10.03) | (1.74-10.44) |
| KI67              | 2.1          | 1.18         | 1.14         | 1.05         | 1.16         | 0.97         | 0.9          |
|                   | (0.75-5.87)  | (0.5-2.81)   | (0.49-2.64)  | (0.45-2.4)   | (0.49-2.74)  | (0.4-2.36)   | (0.36-2.25)  |
| Sorlie †          | 3.89         | 4.42         | 4.49         | 4.48         | 4.28         | 4.42         | 4.45         |
|                   | (1.74-8.70)  | (1.98-9.87)  | (2.03-9.92)  | (2.01-10.02) | (1.89-9.68)  | (1.95-10.01) | (1.96-10.11) |
| KI67              | 2.21         | 1.35         | 1.35         | 1.27         | 1.42         | 1.29         | 1.26         |
|                   | (0.8-6.10)   | (0.58-3.12)  | (0.6-3.03)   | (0.57-2.82)  | (0.63-3.21)  | (0.56-2.97)  | (0.53-2.95)  |
| Hu ¥              | 3.88         | 4.57         | 4.66         | 4.57         | 4.31         | 4.58         | 4.58         |
|                   | (1.6-9.44)   | (1.91-10.97) | (1.95-11.12) | (1.89-11.08) | (1.77-10.48) | (1.81-11.58) | (1.83-11.47) |
| KI67              | 1.87         | 1.16         | 1.1          | 1.14         | 1.34         | 1.1          | 1.11         |
|                   | (0.66-5.29)  | (0.5-2.7)    | (0.49-2.5)   | (0.51-2.54)  | (0.6-3.0)    | (0.47-2.6)   | (0.47-2.64)  |
| Hu †              | 4.64         | 5.2          | 5.29         | 5.22         | 5.22         | 4.99         | 5.15         |
|                   | (2.09-10.29) | (2.37-11.43) | (2.42-11.56) | (2.39-11.37) | (2.4-11.37)  | (2.26-11.0)  | (2.36-11.26) |
| KI67              | 2.2          | 1.42         | 1.4          | 1.62         | 2.0          | 1.79         | 2.01         |
|                   | (0.81-6.03)  | (0.63-3.21)  | (0.63-3.1)   | (0.75-3.47)  | (0.94-4.29)  | (0.82-3.94)  | (0.91-4.43)  |
| Parker ¥          | 5.47         | 6.78         | 6.59         | 6.24         | 5.8          | 5.87         | 5.9          |
|                   | (1.86-16.06) | (2.37-19.33) | (2.36-18.37) | (2.25-17.28) | (2.1-16.01)  | (2.11-16.33) | (2.13-16.36) |
| Ki67              | 1.4          | 0.87         | 0.91         | 1.06         | 1.31         | 1.25         | 1.25         |
|                   | (0.48-4.12)  | (0.37-2.05)  | (0.4-2.08)   | (0.48-2.32)  | (0.6-2.88)   | (0.56-2.8)   | (0.55-2.82)  |
| Parker †          | 4.12         | 4.96         | 4.89         | 4.69         | 4.5          | 4.48         | 4.53         |
|                   | (1.65-10.29) | (2.03-12.08) | (2.06-11.63) | (1.99-11.06) | (1.92-10.54) | (1.91-10.52) | (1.94-10.57) |
| KI67              | 1.65         | 1.04         | 1.1          | 1.3          | 1.64         | 1.68         | 1.74         |
|                   | (0.56-4.83)  | (0.44-2.46)  | (0.48-2.48)  | (0.59-2.83)  | (0.76-3.56)  | (0.76-3.69)  | (0.78-3.87)  |

RS\*=low vs. rest, RS§=high vs. rest; Sorlie¥= normal-like and luminal A vs. rest, Sorlie†= normal-like, luminal A and basal vs. rest; Hu¥= normal-like and luminal A vs. rest, Hu†= normal-like, luminal A and basal vs. rest; Parker¥= normal-like and luminal A vs. rest, Parker†= normal-like, luminal A and basal vs. rest.
