# Supplementary material
Source: PubMed Central journal article supplement (PMC5528643)
Supplement: MOL2-8-741-s012.pdf [file MOL2-8-741-s012.pdf]

**Supplementary Table S2****Patient characteristics by Ki67 status in the Uppsala cohort (n= 233, missing: 20)**

| Characteristic             | Ki67 <10%<br>n (%) | Ki67 ≥10%<br>n (%) |
|----------------------------|--------------------|--------------------|
| <hr/>                      |                    |                    |
| ER                         |                    |                    |
| Positive                   | 96 (94)            | 100 (79)           |
| Negative                   | 6 (6)              | 27 (21)            |
| Missing cases: 4           |                    |                    |
| PR                         |                    |                    |
| Positive                   | 96 (94)            | 112 (88)           |
| Negative                   | 6 (6)              | 15 (12)            |
| Missing cases: 4           |                    |                    |
| Mean age                   | 65                 | 60                 |
| Tumour size                |                    |                    |
| <20 mm                     | 56 (53)            | 45 (35)            |
| ≥20 mm                     | 50 (47)            | 82 (65)            |
| Elston grade               |                    |                    |
| I                          | 48 (46)            | 13 (10)            |
| II                         | 53 (50)            | 66 (53)            |
| III                        | 4 (4)              | 47 (37)            |
| Missing cases: 2           |                    |                    |
| Nodal status               |                    |                    |
| Negative                   | 76 (74)            | 68 (56)            |
| Positive                   | 27 (26)            | 53 (44)            |
| Missing cases: 9           |                    |                    |
| Systemic adjuvant therapy* |                    |                    |
| None                       | 65 (61)            | 65 (52)            |
| Endocrine                  | 32 (30)            | 44 (35)            |
| Chemotherapy               | 7 (7)              | 15 (12)            |
| Both                       | 2 (2)              | 2 (1)              |
| Missing cases: 1           |                    |                    |
| PAM50 subtype              |                    |                    |
| Basal                      | 2 (2)              | 31 (24)            |
| <i>ERBB2</i>               | 9 (9)              | 29 (23)            |
| Luminal A                  | 52 (49)            | 21 (17)            |
| Luminal B                  | 16 (15)            | 36 (28)            |
| Normal-like                | 27 (25)            | 10 (8)             |

\*Endocrine or Chemotherapy refers to each treatment alone or in combination with radiotherapy.
