# Supplementary material
Source: PubMed Central journal article supplement (PMC5528643)
Supplement: MOL2-8-741-s013.pdf [file MOL2-8-741-s013.pdf]

**Supplementary Table S3****Kaplan-Meier pairwise comparisons, Uppsala**

---

|                         |       | <b>P-values (log-rank test)</b> |       |  |
|-------------------------|-------|---------------------------------|-------|--|
| <b>Recurrence score</b> |       |                                 |       |  |
|                         | Low   | Intermediate                    | High  |  |
| Low                     | -     | 0.018                           | 0.001 |  |
| Intermediate            | 0.018 | -                               | 0.531 |  |
| High                    | 0.001 | 0.531                           | -     |  |

---

|                                   |             |           |           |       |           |
|-----------------------------------|-------------|-----------|-----------|-------|-----------|
| <b>Molecular subtype (Sorlie)</b> |             |           |           |       |           |
|                                   | Normal-like | Luminal A | Luminal B | Basal | HER2-like |
| Normal-like                       | -           | 0.904     | 0.006     | 0.654 | 0.363     |
| Luminal A                         | 0.904       | -         | 0.002     | 0.944 | 0.467     |
| Luminal B                         | 0.006       | 0.002     | -         | 0.063 | 0.156     |
| Basal                             | 0.654       | 0.944     | 0.063     | -     | 0.684     |
| HER2-like                         | 0.363       | 0.467     | 0.156     | 0.684 | -         |

---

|                               |             |           |           |       |           |
|-------------------------------|-------------|-----------|-----------|-------|-----------|
| <b>Molecular subtype (Hu)</b> |             |           |           |       |           |
|                               | Normal-like | Luminal A | Luminal B | Basal | HER2-like |
| Normal-like                   | -           | 0.351     | 0.026     | 0.874 | 0.021     |
| Luminal A                     | 0.351       | -         | 0.001     | 0.395 | 0.002     |
| Luminal B                     | 0.026       | 0.001     | -         | 0.047 | 0.706     |
| Basal                         | 0.874       | 0.395     | 0.047     | -     | 0.057     |
| HER2-like                     | 0.021       | 0.002     | 0.706     | 0.057 | -         |

---

|                                   |             |           |           |       |           |
|-----------------------------------|-------------|-----------|-----------|-------|-----------|
| <b>Molecular subtype (Parker)</b> |             |           |           |       |           |
|                                   | Normal-like | Luminal A | Luminal B | Basal | HER2-like |
| Normal-like                       | -           | 0.076     | 0.066     | 0.944 | 0.048     |
| Luminal A                         | 0.076       | -         | <0.001    | 0.108 | <0.001    |
| Luminal B                         | 0.066       | <0.001    | -         | 0.081 | 0.718     |
| Basal                             | 0.944       | 0.108     | 0.081     | -     | 0.094     |
| HER2-like                         | 0.048       | <0.001    | 0.718     | 0.094 | -         |

---
