# Supplementary material
Source: PubMed Central journal article supplement (PMC5528643)
Supplement: MOL2-8-741-s014.pdf [file MOL2-8-741-s014.pdf]

**Supplementary Table S4****Kappa statistics comparing prognostic classification of breast tumours by Ki67 and gene expression signatures**

| Variable                  | Uppsala Cohort     | Stockholm Cohort   |
|---------------------------|--------------------|--------------------|
|                           | $\kappa$ (CI)      | $\kappa$ (CI)      |
| GGI vs Ki67*              | 0.60 (0.49 – 0.70) | 0.44 (0.27 – 0.61) |
| 70-gene vs Ki67*          | 0.55 (0.45 – 0.66) | 0.44 (0.28 – 0.60) |
| p53 vs Ki67*              | 0.60 (0.49 – 0.71) | 0.58 (0.40 – 0.76) |
| Recurrence score vs Ki67* | 0.36 (0.24 – 0.47) | 0.36 (0.20 – 0.53) |
| Sorlie vs Ki67*           | 0.26 (0.14 – 0.38) | 0.31 (0.10 – 0.52) |
| Hu vs Ki67*               | 0.34 (0.22 – 0.46) | 0.49 (0.33 – 0.64) |
| Parker vs Ki67*           | 0.31 (0.19 – 0.43) | 0.45 (0.29 – 0.62) |

$\kappa$  =Kappa value (<0 = no agreement, 0-0.20 = slight agreement, 0.20-0.40 = fair agreement, 0.41- 0.60 = moderate agreement, 0.61-0.80 = substantial agreement, 0.81-1.0 = perfect agreement), CI= 95% Confidence interval

\*Gene expression signature specific ROC Ki67 cutoffs
