# Supplementary material
Source: PubMed Central journal article supplement (PMC5528643)
Supplement: MOL2-8-741-s015.pdf [file MOL2-8-741-s015.pdf]

**Supplementary Table S5**

**Paired gene signature and signature specific Ki67 prognostic classifications for each patient of the Uppsala Cohort (0=Good, 1= Poor Prognosis)**

| Patient ID | GGI | 70-gene | p53 | RS* | Sorlie† | Hu‡ | Parker‡ | Ki11§ | Ki12§ | Ki13§ | Ki15§ | Ki16§ | % Good Prognosis | % Poor Prognosis | Overall Prognostic Risk |
|------------|-----|---------|-----|-----|---------|-----|---------|-------|-------|-------|-------|-------|------------------|------------------|-------------------------|
| 100B08     | 0   | 0       | 0   | 1   | 0       | 0   | 0       | 0     | 0     | 0     | 0     | 0     | 92               | 8                | Good                    |
| 101B88     | 1   | 1       | 1   | 1   | 0       | 0   | 0       | 1     | 1     | 1     | 1     | 1     | 25               | 75               | Poor                    |
| 102B06     | 1   | 1       | 1   | 1   | 0       | 1   | 1       | 1     | 1     | 1     | 1     | 1     | 8                | 92               | Poor                    |
| 103B41     | 1   | 1       | 1   | 1   | 0       | 0   | 0       | 1     | 1     | 1     | 1     | 1     | 25               | 75               | Poor                    |
| 104B91     | 1   | 1       | 0   | 1   | 1       | 0   | 1       | 1     | 1     | 0     | 0     | 0     | 42               | 58               | Poor                    |
| 105B13     | 0   | 0       | 0   | 1   | 0       | 0   | 0       | 0     | 0     | 0     | 0     | 0     | 92               | 8                | Good                    |
| 106B55     | 0   | 0       | 0   | 1   | 0       | 0   | 0       | 1     | 1     | 1     | 1     | 0     | 58               | 42               | Good                    |
| 10B88      | 0   | 0       | 0   | 0   | 0       | 0   | 1       | 0     | 0     | 0     | 0     | 0     | 92               | 8                | Good                    |
| 111B51     | 1   | 1       | 1   | 1   | 1       | 1   | 1       | 1     | 1     | 1     | 1     | 0     | 8                | 92               | Poor                    |
| 112B55     | 0   | 0       | 0   | 0   | 0       | 1   | 1       | 1     | 1     | 1     | 1     | 1     | 42               | 58               | Poor                    |
| 113B11     | 1   | 1       | 0   | 1   | 1       | 1   | 1       | 1     | 1     | 1     | 1     | 1     | 8                | 92               | Poor                    |
| 114B68     | 0   | 1       | 0   | 0   | 0       | 0   | 1       | 0     | 0     | 0     | 0     | 0     | 83               | 17               | Good                    |
| 11B47      | 0   | 0       | 0   | 0   | 0       | 0   | 0       | 0     | 0     | 0     | 0     | 0     | 100              | 0                | Good                    |
| 120B73     | 1   | 1       | 0   | 1   | 0       | 1   | 1       | 1     | 1     | 1     | 1     | 1     | 17               | 83               | Poor                    |
| 122B81     | 0   | 0       | 0   | 0   | 0       | 0   | 0       | 1     | 1     | 1     | 1     | 0     | 67               | 33               | Good                    |
| 124B25     | 0   | 0       | 0   | 1   | 0       | 0   | 0       | 0     | 0     | 0     | 0     | 0     | 92               | 8                | Good                    |
| 127B00     | 1   | 1       | 1   | 1   | 1       | 1   | 1       | 1     | 1     | 1     | 1     | 1     | 0                | 100              | Poor                    |
| 128B48     | 0   | 0       | 0   | 0   | 0       | 0   | 0       | 0     | 0     | 0     | 0     | 0     | 100              | 0                | Good                    |
| 130B92     | 0   | 0       | 0   | 0   | 0       | 0   | 0       | 0     | 0     | 0     | 0     | 0     | 100              | 0                | Good                    |
| 132B80     | 1   | 1       | 0   | 1   | 1       | 1   | 1       | 1     | 1     | 1     | 1     | 1     | 8                | 92               | Poor                    |
| 134B33     | 1   | 1       | 0   | 1   | 1       | 1   | 1       | 1     | 1     | 1     | 1     | 1     | 8                | 92               | Poor                    |
| 135B40     | 0   | 0       | 0   | 0   | 0       | 0   | 0       | 0     | 0     | 0     | 0     | 0     | 100              | 0                | Good                    |
| 136B04     | 0   | 1       | 0   | 1   | 0       | 1   | 1       | 0     | 0     | 0     | 0     | 0     | 67               | 33               | Good                    |
| 137B88     | 0   | 0       | 1   | 1   | 0       | 1   | 1       | 0     | 0     | 0     | 0     | 0     | 67               | 33               | Good                    |

|        |   |   |   |   |   |   |   |   |   |   |   |   |     |    |       |
|--------|---|---|---|---|---|---|---|---|---|---|---|---|-----|----|-------|
| 138B34 | 0 | 0 | 0 | 0 | 0 | 0 | 0 | 0 | 0 | 0 | 0 | 0 | 100 | 0  | Good  |
| 139B03 | 1 | 0 | 0 | 1 | 0 | 1 | 1 | 0 | 0 | 0 | 0 | 0 | 67  | 33 | Good  |
| 13B79  | 0 | 0 | 0 | 0 | 0 | 0 | 0 | 0 | 0 | 0 | 0 | 0 | 100 | 0  | Good  |
| 140B91 | 0 | 0 | 0 | 0 | 0 | 0 | 0 | 0 | 0 | 0 | 0 | 0 | 100 | 0  | Good  |
| 142B05 | 1 | 1 | 1 | 1 | 0 | 1 | 1 | 1 | 1 | 1 | 1 | 1 | 8   | 92 | Poor  |
| 143B81 | 1 | 1 | 1 | 1 | 0 | 1 | 1 | 1 | 1 | 1 | 0 | 0 | 25  | 75 | Poor  |
| 144B49 | 0 | 0 | 0 | 1 | 0 | 0 | 1 | 1 | 1 | 1 | 1 | 1 | 42  | 58 | Poor  |
| 145B10 | 1 | 1 | 1 | 1 | 1 | 0 | 1 | 1 | 1 | 1 | 1 | 1 | 8   | 92 | Poor  |
| 146B39 | 1 | 1 | 1 | 1 | 0 | 0 | 0 | 1 | 1 | 1 | 1 | 1 | 25  | 75 | Poor  |
| 147B19 | 1 | 1 | 1 | 1 | 0 | 1 | 1 | 0 | 0 | 0 | 0 | 0 | 50  | 50 | Equal |
| 148B49 | 0 | 1 | 0 | 0 | 0 | 0 | 0 | 1 | 1 | 1 | 1 | 1 | 50  | 50 | Equal |
| 14B98  | 0 | 0 | 0 | 0 | 0 | 0 | 0 | 1 | 1 | 1 | 1 | 1 | 58  | 42 | Good  |
| 150B81 | 0 | 0 | 0 | 1 | 0 | 1 | 1 | 1 | 1 | 1 | 0 | 0 | 50  | 50 | Equal |
| 151B84 | 0 | 0 | 0 | 0 | 0 | 0 | 0 | 0 | 0 | 0 | 0 | 0 | 100 | 0  | Good  |
| 152B99 | 0 | 0 | 0 | 1 | 0 | 0 | 1 | 0 | 0 | 0 | 0 | 0 | 83  | 17 | Good  |
| 153B09 | 1 | 1 | 1 | 1 | 0 | 0 | 0 | 1 | 1 | 1 | 1 | 1 | 25  | 75 | Poor  |
| 154B42 | 1 | 1 | 0 | 1 | 1 | 1 | 1 | 1 | 1 | 1 | 1 | 1 | 8   | 92 | Poor  |
| 155B52 | 0 | 0 | 0 | 1 | 0 | 0 | 0 | 0 | 0 | 0 | 0 | 0 | 92  | 8  | Good  |
| 156B01 | 0 | 0 | 0 | 0 | 0 | 0 | 0 | 0 | 0 | 0 | 0 | 0 | 100 | 0  | Good  |
| 158B84 | 0 | 1 | 0 | 1 | 0 | 0 | 0 | 0 | 0 | 0 | 0 | 0 | 83  | 17 | Good  |
| 159B47 | 1 | 1 | 0 | 1 | 0 | 1 | 1 | 1 | 1 | 1 | 1 | 0 | 25  | 75 | Poor  |
| 15C94  | 0 | 0 | 0 | 0 | 0 | 0 | 0 | 1 | 1 | 1 | 1 | 1 | 58  | 42 | Good  |
| 160B16 | 0 | 0 | 0 | 0 | 0 | 0 | 0 | 0 | 0 | 0 | 0 | 0 | 100 | 0  | Good  |
| 161B31 | 0 | 0 | 0 | 0 | 0 | 0 | 0 | 0 | 0 | 0 | 0 | 0 | 100 | 0  | Good  |
| 162B98 | 0 | 1 | 0 | 0 | 0 | 1 | 1 | 1 | 1 | 1 | 1 | 1 | 33  | 67 | Poor  |
| 164B81 | 1 | 1 | 1 | 1 | 0 | 0 | 1 | 1 | 1 | 1 | 1 | 1 | 17  | 83 | Poor  |
| 165B72 | 0 | 1 | 0 | 1 | 0 | 1 | 1 | 0 | 0 | 0 | 0 | 0 | 67  | 33 | Good  |

|        |   |   |   |   |   |   |   |   |   |   |   |   |     |     |       |
|--------|---|---|---|---|---|---|---|---|---|---|---|---|-----|-----|-------|
| 166B79 | 0 | 0 | 0 | 0 | 0 | 1 | 1 | 0 | 0 | 0 | 0 | 0 | 83  | 17  | Good  |
| 168B51 | 0 | 0 | 0 | 0 | 0 | 0 | 0 | 1 | 1 | 0 | 0 | 0 | 83  | 17  | Good  |
| 169B79 | 0 | 0 | 0 | 1 | 0 | 0 | 1 | 0 | 0 | 0 | 0 | 0 | 83  | 17  | Good  |
| 16C97  | 0 | 0 | 0 | 0 | 0 | 0 | 0 | 0 | 0 | 0 | 0 | 0 | 100 | 0   | Good  |
| 170B15 | 0 | 0 | 0 | 0 | 0 | 0 | 0 | 0 | 0 | 0 | 0 | 0 | 100 | 0   | Good  |
| 171B77 | 1 | 1 | 1 | 1 | 1 | 1 | 1 | 1 | 1 | 1 | 1 | 1 | 0   | 100 | Poor  |
| 172B19 | 1 | 1 | 1 | 1 | 0 | 0 | 0 | 1 | 1 | 0 | 0 | 0 | 50  | 50  | Equal |
| 173B43 | 0 | 0 | 0 | 0 | 0 | 0 | 0 | 0 | 0 | 0 | 0 | 0 | 100 | 0   | Good  |
| 174B41 | 0 | 0 | 0 | 1 | 0 | 0 | 0 | 1 | 1 | 0 | 0 | 0 | 75  | 25  | Good  |
| 175B72 | 0 | 1 | 0 | 1 | 0 | 0 | 1 | 0 | 0 | 0 | 0 | 0 | 75  | 25  | Good  |
| 176B74 | 0 | 0 | 0 | 0 | 0 | 0 | 0 | 0 | 0 | 0 | 0 | 0 | 100 | 0   | Good  |
| 177B67 | 0 | 0 | 0 | 0 | 0 | 0 | 0 | 0 | 0 | 0 | 0 | 0 | 100 | 0   | Good  |
| 179B28 | 0 | 1 | 0 | 1 | 0 | 1 | 1 | 1 | 1 | 1 | 1 | 1 | 25  | 75  | Poor  |
| 17C40  | 0 | 0 | 0 | 1 | 0 | 0 | 0 | 0 | 0 | 0 | 0 | 0 | 92  | 8   | Good  |
| 180B38 | 0 | 1 | 0 | 0 | 0 | 0 | 0 | 0 | 0 | 0 | 0 | 0 | 92  | 8   | Good  |
| 182B43 | 1 | 1 | 1 | 1 | 0 | 0 | 0 | 1 | 1 | 1 | 1 | 1 | 25  | 75  | Poor  |
| 183B75 | 0 | 1 | 0 | 1 | 0 | 1 | 1 | 1 | 1 | 1 | 1 | 1 | 25  | 75  | Poor  |
| 184B38 | 0 | 0 | 0 | 1 | 0 | 0 | 0 | 0 | 0 | 0 | 0 | 0 | 92  | 8   | Good  |
| 186B22 | 1 | 1 | 0 | 1 | 0 | 1 | 1 | 1 | 1 | 1 | 0 | 0 | 33  | 67  | Poor  |
| 187B36 | 1 | 1 | 1 | 1 | 1 | 1 | 1 | 1 | 1 | 1 | 1 | 1 | 0   | 100 | Poor  |
| 188B13 | 0 | 1 | 1 | 1 | 0 | 1 | 1 | 1 | 1 | 1 | 1 | 1 | 17  | 83  | Poor  |
| 189B83 | 1 | 1 | 1 | 1 | 1 | 0 | 1 | 1 | 1 | 1 | 1 | 1 | 8   | 92  | Poor  |
| 18C56  | 0 | 0 | 0 | 0 | 0 | 1 | 0 | 1 | 1 | 1 | 0 | 0 | 67  | 33  | Good  |
| 191B79 | 1 | 1 | 0 | 1 | 1 | 1 | 1 | 0 | 0 | 0 | 0 | 0 | 50  | 50  | Equal |
| 192B69 | 0 | 0 | 0 | 0 | 0 | 0 | 0 | 0 | 0 | 0 | 0 | 0 | 100 | 0   | Good  |
| 193B72 | 0 | 1 | 1 | 1 | 0 | 0 | 1 | 1 | 1 | 1 | 1 | 1 | 25  | 75  | Poor  |
| 195B75 | 0 | 0 | 0 | 0 | 0 | 0 | 1 | 0 | 0 | 0 | 0 | 0 | 92  | 8   | Good  |

|        |   |   |   |   |   |   |   |   |   |   |   |   |     |    |       |
|--------|---|---|---|---|---|---|---|---|---|---|---|---|-----|----|-------|
| 198B90 | 0 | 0 | 0 | 0 | 0 | 0 | 0 | 0 | 0 | 0 | 0 | 0 | 100 | 0  | Good  |
| 199B55 | 0 | 1 | 0 | 1 | 0 | 0 | 1 | 1 | 1 | 1 | 1 | 1 | 33  | 67 | Poor  |
| 19C33  | 0 | 1 | 1 | 1 | 0 | 0 | 0 | 0 | 0 | 0 | 0 | 0 | 75  | 25 | Good  |
| 200B47 | 0 | 0 | 0 | 0 | 0 | 0 | 0 | 0 | 0 | 0 | 0 | 0 | 100 | 0  | Good  |
| 201B68 | 0 | 0 | 0 | 1 | 1 | 0 | 0 | 0 | 0 | 0 | 0 | 0 | 83  | 17 | Good  |
| 203B49 | 0 | 0 | 0 | 1 | 0 | 0 | 0 | 0 | 0 | 0 | 0 | 0 | 92  | 8  | Good  |
| 204B85 | 0 | 0 | 0 | 0 | - | 0 | 0 | 0 | 0 | 0 | 0 | 0 | 100 | 0  | Good  |
| 205B99 | 1 | 0 | 0 | 0 | 0 | 0 | 0 | 1 | 0 | 0 | 0 | 0 | 83  | 17 | Good  |
| 206C05 | 0 | 0 | 0 | 0 | 0 | 1 | 1 | 1 | 1 | 1 | 0 | 0 | 58  | 42 | Good  |
| 207C08 | 0 | 0 | 0 | 0 | 0 | 0 | 0 | 0 | 0 | 0 | 0 | 0 | 100 | 0  | Good  |
| 208C06 | 1 | 1 | 1 | 1 | 0 | 1 | 1 | 1 | 1 | 1 | 1 | 1 | 8   | 92 | Poor  |
| 209C10 | 0 | 0 | 0 | 0 | 0 | 0 | 0 | 0 | 0 | 0 | 0 | 0 | 100 | 0  | Good  |
| 210C72 | 0 | 0 | 0 | 0 | 0 | 0 | 0 | 0 | 0 | 0 | 0 | 0 | 100 | 0  | Good  |
| 211C88 | 0 | 0 | 0 | 0 | 0 | 0 | 1 | 1 | 1 | 1 | 1 | 1 | 50  | 50 | Equal |
| 212C21 | 0 | 0 | 0 | 0 | 0 | 0 | 0 | 0 | 0 | 0 | 0 | 0 | 100 | 0  | Good  |
| 213C36 | 1 | 1 | 0 | 1 | 0 | 1 | 0 | 1 | 1 | 1 | 0 | 0 | 42  | 58 | Poor  |
| 216C61 | 0 | 0 | 0 | 1 | 0 | 0 | 1 | 0 | 0 | 0 | 0 | 0 | 83  | 17 | Good  |
| 217C79 | 0 | 0 | 0 | 0 | 0 | 0 | 0 | 0 | 0 | 0 | 0 | 0 | 100 | 0  | Good  |
| 218C29 | 0 | 0 | 0 | 0 | 0 | 0 | 1 | 0 | 0 | 0 | 0 | 0 | 92  | 8  | Good  |
| 21C28  | 0 | 0 | 0 | 1 | - | 0 | 0 | 0 | 0 | 0 | 0 | 0 | 91  | 9  | Good  |
| 220C70 | 0 | 0 | 0 | 1 | 0 | 0 | 0 | 0 | 0 | 0 | 0 | 0 | 92  | 8  | Good  |
| 221C14 | 0 | 1 | 0 | 1 | 1 | 0 | 1 | 1 | 1 | 1 | 0 | 0 | 42  | 58 | Poor  |
| 222C26 | 0 | 0 | 0 | 0 | 0 | 0 | 1 | 0 | 0 | 0 | 0 | 0 | 92  | 8  | Good  |
| 223C51 | 0 | 0 | 0 | 1 | 0 | 0 | 0 | 0 | 0 | 0 | 0 | 0 | 92  | 8  | Good  |
| 224C93 | 0 | 1 | 1 | 1 | 0 | 0 | 1 | 1 | 0 | 0 | 0 | 0 | 58  | 42 | Good  |
| 225C52 | 1 | 1 | 0 | 1 | 1 | 1 | 1 | 1 | 1 | 1 | 1 | 1 | 8   | 92 | Poor  |
| 226C06 | 1 | 1 | 1 | 1 | 0 | 0 | 0 | 1 | 1 | 1 | 1 | 1 | 25  | 75 | Poor  |

|        |   |   |   |   |   |   |   |   |   |   |   |   |     |     |       |
|--------|---|---|---|---|---|---|---|---|---|---|---|---|-----|-----|-------|
| 227C50 | 0 | 0 | 0 | 0 | 0 | 0 | 0 | 0 | 0 | 0 | 0 | 0 | 100 | 0   | Good  |
| 229C44 | 0 | 0 | 0 | 0 | 0 | 0 | 0 | 0 | 0 | 0 | 0 | 0 | 100 | 0   | Good  |
| 22C62  | 0 | 0 | 0 | 0 | 0 | 0 | 0 | 0 | 0 | 0 | 0 | 0 | 100 | 0   | Good  |
| 230C47 | 1 | 1 | 1 | 1 | 0 | 1 | 1 | 0 | 0 | 0 | 0 | 0 | 50  | 50  | Equal |
| 231C80 | 0 | 0 | 0 | 0 | 0 | 0 | 0 | 1 | 1 | 1 | 0 | 0 | 75  | 25  | Good  |
| 232C58 | 1 | 1 | 1 | 1 | 1 | 1 | 1 | 1 | 1 | 1 | 1 | 1 | 0   | 100 | Poor  |
| 233C91 | 0 | 0 | 0 | 0 | 0 | 0 | 0 | 1 | 1 | 1 | 0 | 0 | 75  | 25  | Good  |
| 234C15 | 1 | 1 | 1 | 1 | 0 | 0 | 0 | 1 | 1 | 1 | 1 | 1 | 25  | 75  | Poor  |
| 235C20 | 1 | 1 | 0 | 1 | 0 | 0 | 1 | 0 | 0 | 0 | 0 | 0 | 67  | 33  | Good  |
| 236C55 | 0 | 0 | 0 | 0 | 0 | 0 | 0 | 0 | 0 | 0 | 0 | 0 | 100 | 0   | Good  |
| 237C56 | 1 | 1 | 0 | 1 | 1 | 1 | 1 | 1 | 1 | 1 | 1 | 1 | 8   | 92  | Poor  |
| 238C87 | 1 | 1 | 1 | 1 | 0 | 0 | 0 | 0 | 0 | 0 | 0 | 0 | 67  | 33  | Good  |
| 239C32 | 0 | 1 | 0 | 1 | 0 | 0 | 0 | 1 | 1 | 1 | 1 | 1 | 42  | 58  | Poor  |
| 23C52  | 1 | 1 | 0 | 1 | 1 | 1 | 1 | 1 | 1 | 1 | 1 | 1 | 8   | 92  | Poor  |
| 240C54 | 1 | 1 | 1 | 1 | - | 0 | 1 | 1 | 1 | 1 | 1 | 1 | 9   | 91  | Poor  |
| 241C01 | 1 | 1 | 1 | 1 | 1 | 1 | 1 | 1 | 1 | 1 | 1 | 1 | 0   | 100 | Poor  |
| 242C21 | 1 | 1 | 0 | 0 | 0 | 1 | 0 | 1 | 1 | 1 | 1 | 1 | 33  | 67  | Poor  |
| 243C70 | 0 | 0 | 0 | 1 | - | 0 | 0 | 0 | 0 | 0 | 0 | 0 | 91  | 9   | Good  |
| 244C89 | 1 | 1 | 0 | 1 | 0 | 1 | 1 | 1 | 1 | 1 | 1 | 1 | 17  | 83  | Poor  |
| 245C22 | 1 | 1 | 1 | 1 | 0 | 0 | 0 | 1 | 1 | 0 | 0 | 0 | 50  | 50  | Equal |
| 246C75 | 0 | 0 | 0 | 1 | 0 | 0 | 0 | 0 | 0 | 0 | 0 | 0 | 92  | 8   | Good  |
| 247C76 | 0 | 0 | 0 | 0 | 0 | 1 | 0 | 0 | 0 | 0 | 0 | 0 | 92  | 8   | Good  |
| 248C91 | 0 | 0 | 0 | 0 | 0 | 0 | 0 | 0 | 0 | 0 | 0 | 0 | 100 | 0   | Good  |
| 249C42 | 1 | 1 | 1 | 1 | 0 | 0 | 1 | 1 | 1 | 1 | 1 | 1 | 17  | 83  | Poor  |
| 24C30  | 0 | 1 | 0 | 0 | 0 | 0 | 0 | 1 | 1 | 0 | 0 | 0 | 75  | 25  | Good  |
| 250C78 | 1 | 1 | 1 | 1 | 0 | 0 | 0 | 1 | 1 | 1 | 1 | 1 | 25  | 75  | Poor  |
| 251C14 | 0 | 0 | 0 | 0 | 0 | 0 | 0 | 0 | 0 | 0 | 0 | 0 | 100 | 0   | Good  |

|        |   |   |   |   |   |   |   |   |   |   |   |   |     |    |       |
|--------|---|---|---|---|---|---|---|---|---|---|---|---|-----|----|-------|
| 252C64 | 1 | 1 | 1 | 1 | 0 | 0 | 0 | 1 | 1 | 1 | 1 | 1 | 25  | 75 | Poor  |
| 254C80 | 0 | 0 | 0 | 0 | 0 | 0 | 0 | 0 | 0 | 0 | 0 | 0 | 100 | 0  | Good  |
| 255C06 | 0 | 0 | 0 | 0 | 0 | 0 | 0 | 0 | 0 | 0 | 0 | 0 | 100 | 0  | Good  |
| 256C45 | 1 | 1 | 1 | 1 | 0 | 0 | 1 | 1 | 1 | 1 | 1 | 1 | 17  | 83 | Poor  |
| 257C87 | 0 | 0 | 0 | 1 | 0 | 0 | 0 | 1 | 1 | 1 | 0 | 0 | 67  | 33 | Good  |
| 258C21 | 0 | 0 | 0 | 0 | 0 | 0 | 0 | 0 | 0 | 0 | 0 | 0 | 100 | 0  | Good  |
| 259C74 | 0 | 0 | 0 | 0 | 0 | 0 | 0 | 0 | 0 | 0 | 0 | 0 | 100 | 0  | Good  |
| 260C91 | 0 | 1 | 1 | 1 | 0 | 0 | 1 | 1 | 1 | 1 | 1 | 1 | 25  | 75 | Poor  |
| 261C94 | 0 | 0 | 0 | 1 | 0 | 0 | 0 | 0 | 0 | 0 | 0 | 0 | 92  | 8  | Good  |
| 262C85 | 0 | 1 | 0 | 0 | 0 | 0 | 0 | 0 | 0 | 0 | 0 | 0 | 92  | 8  | Good  |
| 263C82 | 0 | 0 | 0 | 0 | 0 | 0 | 0 | 0 | 0 | 0 | 0 | 0 | 100 | 0  | Good  |
| 265C40 | 1 | 1 | 0 | 0 | 0 | 1 | 1 | 1 | 1 | 0 | 0 | 0 | 50  | 50 | Equal |
| 266C51 | 0 | 0 | 0 | 1 | 0 | 0 | 0 | 0 | 0 | 0 | 0 | 0 | 92  | 8  | Good  |
| 267C04 | 0 | 0 | 0 | 0 | 0 | 1 | 0 | 0 | 0 | 0 | 0 | 0 | 92  | 8  | Good  |
| 268C87 | 1 | 1 | 1 | 1 | 0 | 0 | 0 | 1 | 1 | 1 | 1 | 1 | 25  | 75 | Poor  |
| 269C68 | 1 | 1 | 1 | 1 | 0 | 0 | 0 | 1 | 1 | 1 | 1 | 1 | 25  | 75 | Poor  |
| 26C23  | 0 | 1 | 1 | 1 | 0 | 0 | 0 | 1 | 1 | 1 | 1 | 1 | 33  | 67 | Poor  |
| 270C93 | 1 | 1 | 1 | 1 | 0 | 0 | 0 | 1 | 1 | 1 | 1 | 1 | 25  | 75 | Poor  |
| 271C71 | 1 | 1 | 1 | 1 | 0 | 1 | 1 | 1 | 1 | 1 | 1 | 1 | 8   | 92 | Poor  |
| 272C88 | 0 | 0 | 0 | 0 | 0 | 0 | 0 | 1 | 1 | 1 | 1 | 1 | 58  | 42 | Good  |
| 274C81 | 0 | 0 | 0 | 0 | 0 | 0 | 0 | 0 | 0 | 0 | 0 | 0 | 100 | 0  | Good  |
| 275C70 | 0 | 0 | 0 | 0 | 0 | 0 | 0 | 0 | 0 | 0 | 0 | 0 | 100 | 0  | Good  |
| 277C64 | 0 | 0 | 0 | 0 | 0 | 0 | 0 | 0 | 0 | 0 | 0 | 0 | 100 | 0  | Good  |
| 278C80 | 0 | 1 | 1 | 1 | 0 | 0 | 1 | 1 | 1 | 1 | 1 | 1 | 25  | 75 | Poor  |
| 279C61 | 1 | 1 | 1 | 1 | 0 | 0 | 0 | 1 | 1 | 1 | 1 | 1 | 25  | 75 | Poor  |
| 27C82  | 0 | 1 | 0 | 1 | - | 0 | 0 | 1 | 1 | 0 | 0 | 0 | 64  | 36 | Good  |
| 282C51 | 0 | 0 | 0 | 1 | 0 | 0 | 0 | 0 | 0 | 0 | 0 | 0 | 92  | 8  | Good  |

|        |   |   |   |   |   |   |   |   |   |   |   |   |     |     |       |
|--------|---|---|---|---|---|---|---|---|---|---|---|---|-----|-----|-------|
| 283C22 | 0 | 1 | 0 | 1 | 0 | 1 | 1 | 0 | 0 | 0 | 0 | 0 | 67  | 33  | Good  |
| 284C63 | 0 | 0 | 0 | 1 | 0 | 0 | 0 | 0 | 0 | 0 | 0 | 0 | 92  | 8   | Good  |
| 287C67 | 1 | 1 | 1 | 1 | 0 | 0 | 0 | 1 | 1 | 1 | 1 | 1 | 25  | 75  | Poor  |
| 289C75 | 0 | 0 | 0 | 0 | 0 | 0 | 0 | 1 | 1 | 0 | 0 | 0 | 83  | 17  | Good  |
| 28C76  | 0 | 0 | 0 | 1 | 0 | 0 | 0 | 1 | 1 | 1 | 1 | 0 | 58  | 42  | Good  |
| 290C91 | 0 | 0 | 0 | 0 | 0 | 0 | 0 | 0 | 0 | 0 | 0 | 0 | 100 | 0   | Good  |
| 296C95 | 0 | 0 | 0 | 0 | 0 | 0 | 0 | 0 | 0 | 0 | 0 | 0 | 100 | 0   | Good  |
| 297C26 | 0 | 0 | 0 | 1 | 0 | 0 | 0 | 0 | 0 | 0 | 0 | 0 | 92  | 8   | Good  |
| 298C47 | 0 | 1 | 0 | 0 | 1 | 1 | 1 | 1 | 1 | 1 | 0 | 0 | 42  | 58  | Poor  |
| 301C66 | 0 | 1 | 1 | 1 | 0 | 0 | 0 | 0 | 0 | 0 | 0 | 0 | 75  | 25  | Good  |
| 303C36 | 1 | 1 | 1 | 1 | 0 | 0 | 0 | 1 | 1 | 1 | 1 | 1 | 25  | 75  | Poor  |
| 304C89 | 0 | 0 | 0 | 1 | 0 | 0 | 0 | 1 | 1 | 1 | 1 | 1 | 50  | 50  | Equal |
| 307C50 | 0 | 1 | 0 | 1 | 0 | 0 | 1 | 0 | 0 | 0 | 0 | 0 | 75  | 25  | Good  |
| 308C93 | 1 | 1 | 1 | 1 | 0 | 0 | 0 | 1 | 1 | 1 | 1 | 1 | 25  | 75  | Poor  |
| 309C49 | 1 | 1 | 1 | 1 | 0 | 0 | 0 | 1 | 1 | 1 | 1 | 1 | 25  | 75  | Poor  |
| 311A27 | 1 | 1 | 1 | 1 | 1 | 1 | 1 | 1 | 1 | 1 | 1 | 1 | 0   | 100 | Poor  |
| 313A87 | 1 | 1 | 1 | 1 | 1 | 1 | 1 | 1 | 1 | 1 | 1 | 1 | 0   | 100 | Poor  |
| 314B55 | 1 | 1 | 1 | 1 | 0 | 0 | 0 | 1 | 1 | 1 | 1 | 1 | 25  | 75  | Poor  |
| 315C75 | 0 | 0 | 0 | 0 | 0 | 0 | 0 | 0 | 0 | 0 | 0 | 0 | 100 | 0   | Good  |
| 316C65 | 0 | 0 | 0 | 1 | 0 | 0 | 0 | 0 | 0 | 0 | 0 | 0 | 92  | 8   | Good  |
| 33C30  | 0 | 0 | 0 | 0 | 0 | 0 | 0 | 0 | 0 | 0 | 0 | 0 | 100 | 0   | Good  |
| 34C80  | 0 | 0 | 0 | 1 | 0 | 0 | 0 | 0 | 0 | 0 | 0 | 0 | 92  | 8   | Good  |
| 35C29  | 0 | 0 | 0 | 1 | 0 | 0 | 0 | 0 | 0 | 0 | 0 | 0 | 92  | 8   | Good  |
| 36C17  | 0 | 0 | 0 | 1 | - | 0 | 0 | 0 | 0 | 0 | 0 | 0 | 91  | 9   | Good  |
| 40C57  | 0 | 0 | 0 | 1 | 0 | 0 | 0 | 1 | 1 | 0 | 0 | 0 | 75  | 25  | Good  |
| 41C65  | 0 | 1 | 0 | 1 | - | 0 | 1 | 0 | 0 | 0 | 0 | 0 | 73  | 27  | Good  |
| 42C57  | 0 | 0 | 0 | 0 | 0 | 0 | 0 | 0 | 0 | 0 | 0 | 0 | 100 | 0   | Good  |

|       |   |   |   |   |   |   |   |   |   |   |   |   |     |     |       |
|-------|---|---|---|---|---|---|---|---|---|---|---|---|-----|-----|-------|
| 43C47 | 0 | 1 | 0 | 0 | 0 | 0 | 0 | 1 | 0 | 0 | 0 | 0 | 83  | 17  | Good  |
| 44A53 | 0 | 0 | 0 | 0 | 0 | 0 | 0 | 1 | 1 | 1 | 0 | 0 | 75  | 25  | Good  |
| 45A96 | 0 | 0 | 0 | 0 | 0 | 1 | 1 | 0 | 0 | 0 | 0 | 0 | 83  | 17  | Good  |
| 46A25 | 1 | 1 | 1 | 1 | 1 | 1 | 1 | 1 | 1 | 1 | 1 | 1 | 0   | 100 | Poor  |
| 47A87 | 1 | 1 | 1 | 1 | 1 | 0 | 1 | 0 | 0 | 0 | 0 | 0 | 50  | 50  | Equal |
| 48A46 | 0 | 0 | 0 | 0 | 0 | 0 | 0 | 0 | 0 | 0 | 0 | 0 | 100 | 0   | Good  |
| 49A07 | 0 | 1 | 0 | 1 | 0 | 0 | 0 | 0 | 0 | 0 | 0 | 0 | 83  | 17  | Good  |
| 50A91 | 0 | 1 | 0 | 1 | 1 | 0 | 0 | 1 | 1 | 1 | 1 | 1 | 33  | 67  | Poor  |
| 51A98 | 1 | 0 | 0 | 1 | 0 | 1 | 0 | 0 | 0 | 0 | 0 | 0 | 75  | 25  | Good  |
| 52A90 | 0 | 0 | 0 | 0 | - | 0 | 0 | 1 | 0 | 0 | 0 | 0 | 91  | 9   | Good  |
| 53A06 | 1 | 1 | 0 | 1 | 1 | 1 | 1 | 1 | 1 | 1 | 1 | 1 | 8   | 92  | Poor  |
| 54A09 | 1 | 1 | 1 | 1 | 0 | 0 | 0 | 1 | 1 | 1 | 1 | 1 | 25  | 75  | Poor  |
| 55A79 | 1 | 1 | 0 | 1 | 0 | 1 | 1 | 0 | 0 | 0 | 0 | 0 | 58  | 42  | Good  |
| 56A94 | 0 | 1 | 0 | 1 | 0 | 0 | 0 | 0 | 0 | 0 | 0 | 0 | 83  | 17  | Good  |
| 58A50 | 1 | 1 | 1 | 1 | 1 | 1 | 1 | 1 | 1 | 1 | 1 | 1 | 0   | 100 | Poor  |
| 5B97  | 1 | 1 | 1 | 1 | 0 | 1 | 1 | 1 | 1 | 1 | 1 | 1 | 8   | 92  | Poor  |
| 60A05 | 0 | 0 | 0 | 0 | 0 | 0 | 0 | 0 | 0 | 0 | 0 | 0 | 100 | 0   | Good  |
| 61A53 | 0 | 0 | 0 | 1 | 0 | 0 | 1 | 1 | 1 | 1 | 0 | 0 | 58  | 42  | Good  |
| 62A02 | 1 | 1 | 1 | 1 | 0 | 0 | 0 | 1 | 1 | 1 | 1 | 1 | 25  | 75  | Poor  |
| 63A62 | 0 | 0 | 0 | 1 | 0 | 0 | 0 | 1 | 1 | 0 | 0 | 0 | 75  | 25  | Good  |
| 64A59 | 1 | 1 | 1 | 1 | 0 | 0 | 0 | 1 | 1 | 1 | 1 | 1 | 25  | 75  | Poor  |
| 65A68 | 0 | 0 | 0 | 1 | 1 | 0 | 0 | 0 | 0 | 0 | 0 | 0 | 83  | 17  | Good  |
| 66A84 | 1 | 1 | 1 | 1 | 1 | 1 | 1 | 1 | 1 | 0 | 0 | 0 | 25  | 75  | Poor  |
| 67A43 | 1 | 1 | 1 | 1 | 1 | 0 | 1 | 1 | 1 | 1 | 1 | 1 | 8   | 92  | Poor  |
| 69A93 | 1 | 1 | 1 | 1 | 0 | 0 | 0 | 1 | 1 | 1 | 1 | 1 | 25  | 75  | Poor  |
| 6B85  | 1 | 1 | 0 | 1 | 0 | 1 | 1 | 1 | 1 | 1 | 1 | 1 | 17  | 83  | Poor  |
| 70A79 | 1 | 1 | 1 | 1 | 0 | 0 | 0 | 1 | 1 | 1 | 1 | 1 | 25  | 75  | Poor  |



|       |   |   |    |   |   |   |   |   |   |   |   |   |     |     |       |
|-------|---|---|----|---|---|---|---|---|---|---|---|---|-----|-----|-------|
| 72A92 | 0 | 0 | 0  | 0 | 0 | 0 | 0 | 0 | 0 | 0 | 0 | 0 | 100 | 0   | Good  |
| 73A01 | 0 | 1 | 1  | 1 | 0 | 1 | 1 | 1 | 1 | 1 | 1 | 1 | 17  | 83  | Poor  |
| 74A63 | 0 | 0 | 0  | 1 | 0 | 0 | 0 | 0 | 0 | 0 | 0 | 0 | 92  | 8   | Good  |
| 75A01 | 0 | 0 | 0  | 1 | 0 | 0 | 1 | 0 | 0 | 0 | 0 | 0 | 83  | 17  | Good  |
| 76A44 | 1 | 1 | 0  | 1 | 0 | 1 | 1 | 1 | 1 | 1 | 1 | 1 | 17  | 83  | Poor  |
| 77A50 | 0 | 0 | 0  | 0 | 0 | 0 | 0 | 0 | 0 | 0 | 0 | 0 | 100 | 0   | Good  |
| 79A35 | 1 | 1 | 1  | 1 | 1 | 1 | 1 | 1 | 1 | 1 | 1 | 1 | 0   | 100 | Poor  |
| 7B96  | 0 | 1 | 1  | 1 | 0 | 1 | 1 | 1 | 1 | 1 | 1 | 1 | 17  | 83  | Poor  |
| 82A83 | 1 | 0 | 1  | 1 | 1 | 0 | 1 | 1 | 1 | 1 | 1 | 1 | 17  | 83  | Poor  |
| 83A37 | 0 | 0 | NA | 0 | 0 | 0 | 0 | 0 | 0 | 0 | 0 | 0 | 100 | 0   | Good  |
| 84A44 | 1 | 0 | 0  | 0 | 0 | 0 | 1 | 1 | 1 | 1 | 1 | 0 | 50  | 50  | Equal |
| 85A03 | 1 | 1 | 0  | 1 | 1 | 1 | 1 | 0 | 0 | 0 | 0 | 0 | 50  | 50  | Equal |
| 86A40 | 1 | 1 | 1  | 1 | 0 | 0 | 0 | 1 | 1 | 1 | 1 | 1 | 25  | 75  | Poor  |
| 88A67 | 0 | 0 | 0  | 1 | 1 | 1 | 1 | 1 | 1 | 1 | 1 | 1 | 25  | 75  | Poor  |
| 89A64 | 1 | 1 | NA | 1 | 1 | 0 | 0 | 1 | 1 | 1 | 1 | 1 | 25  | 75  | Poor  |
| 8B87  | 0 | 0 | 0  | 1 | 0 | 0 | 0 | 0 | 0 | 0 | 0 | 0 | 92  | 8   | Good  |
| 94A16 | 0 | 0 | 0  | 0 | 0 | 0 | 0 | 0 | 0 | 0 | 0 | 0 | 100 | 0   | Good  |
| 96A21 | 0 | 0 | 0  | 0 | 0 | 0 | 0 | 1 | 1 | 1 | 0 | 0 | 75  | 25  | Good  |
| 99A50 | 0 | 1 | 0  | 1 | 0 | 0 | 0 | 1 | 0 | 0 | 0 | 0 | 75  | 25  | Good  |
| 9B52  | 0 | 1 | 0  | 1 | 1 | 1 | 1 | 0 | 0 | 0 | 0 | 0 | 58  | 42  | Good  |

\* High or intermediate recurrence score grouping; low as reference.

† Luminal B subtype grouping; others as reference.

‡ Luminal B or HER2 subtype grouping; others as reference.

§Note: Each Ki67 cutoff is paired to a gene signature. E.g. Tumour 104B91 has a Ki67 value of 12% as defined on a whole-tumour section by a trained pathologist. For the purposes of our analysis GGI is paired with a ROC defined Ki67 cutoff of 15% in the Uppsala dataset. Thus, for the GGI-Ki67 pairing, Ki67 designates this sample as good prognosis (as it is *less than* 15%). In contrast, the 70-gene signature is paired with a ROC defined Ki67 cutoff of 11%, meaning for the 70-gene/Ki67 pairing, Ki67 designates the same sample as poor prognosis (as it is *greater than* 11%).
