# Supplementary material
Source: PubMed Central journal article supplement (PMC5528643)
Supplement: MOL2-8-741-s016.pdf [file MOL2-8-741-s016.pdf]

**Supplemental Table 6****Similarity in classification between Ki67 and prognostic gene signatures in the ER-positive patients of the Uppsala material**

| <b>GGI</b>               | <b>Ki67 (%)</b> |    |    |    |    |    |     | <b>AUC</b> | <b>Similarity</b> |
|--------------------------|-----------------|----|----|----|----|----|-----|------------|-------------------|
|                          | <10             | 10 | 11 | 12 | 15 | 20 | >20 |            |                   |
| Grade1                   | 90              | 6  | 3  | 18 | 10 | 3  | 10  | 0.85       | 81 %              |
| Grade3                   | 6               | 0  | 1  | 7  | 9  | 2  | 31  |            |                   |
| <b>70-gene signature</b> |                 |    |    |    |    |    |     |            |                   |
| Good                     | 77              | 6  | 2  | 14 | 7  | 2  | 4   | 0.81       | 76 %              |
| Poor                     | 19              | 0  | 2  | 11 | 12 | 3  | 37  |            |                   |
| <b>Recurrence score</b>  |                 |    |    |    |    |    |     |            |                   |
| Low                      | 51              | 5  | 3  | 11 | 5  | 1  | 4   | 0.68       | 65 %              |
| Intermediate             | 25              | 1  | 1  | 6  | 4  | 1  | 5   |            |                   |
| High                     | 20              | 0  | 0  | 8  | 10 | 3  | 32  |            |                   |

Best signature-reproducing Ki67 cutoffs were identified with receiver operating characteristics (ROC). For recurrence score levels were grouped to most accurately reflect outcome similarities/ dissimilarities: high vs. intermediate/low. The area under the curve (AUC; from ROC-analysis) and similarity with best performing cut-off (indicated with dashed red line) for each gene classifier on the right.
