# Supplementary material
Source: PubMed Central journal article supplement (PMC5528643)
Supplement: MOL2-8-741-s017.pdf [file MOL2-8-741-s017.pdf]

**Supplementary Table S7****Univariate analysis of clinicopathological characteristics, BCSS endpoint**

| Characteristic            | Uppsala (n=253) |             |                | Stockholm (n=159) |              |                |
|---------------------------|-----------------|-------------|----------------|-------------------|--------------|----------------|
|                           | HR              | 95% CI      | <i>P</i> value | HR                | 95% CI       | <i>P</i> value |
| ER*                       | 0.90            | 0.43 – 1.88 | 0.78           | 1.13              | 0.52 – 2.46  | 0.75           |
| PR*                       | 1.49            | 0.71 – 3.12 | 0.29           | 2.05              | 1.09 – 3.87  | 0.03           |
| Age <sup>†</sup>          | 0.76            | 0.45 – 1.28 | 0.30           | 0.76              | 0.45 – 1.28  | 0.30           |
| Tumour size <sup>‡</sup>  | 3.65            | 2.06 – 6.47 | <0.001         | 1.73              | 0.87 – 3.41  | 0.12           |
| Elston grade <sup>§</sup> | 3.01            | 1.49 – 6.06 | 0.002          | 5.08              | 1.22 – 21.10 | 0.03           |
| Nodal status <sup>¥</sup> | 3.75            | 2.33 – 6.05 | <0.001         | 1.52              | 0.81 – 2.84  | 0.19           |

HR= Hazard ratio, CI= Confidence interval

\*ER; PR positive vs. negative

<sup>†</sup>Age <50 vs. ≥50

<sup>‡</sup>Size <20 vs. ≥20

<sup>§</sup>Grade I vs. II and III

<sup>¥</sup>Nodal status, negative vs. positive
