# Supplementary material
Source: PubMed Central journal article supplement (PMC5528643)
Supplement: MOL2-8-741-s018.pdf [file MOL2-8-741-s018.pdf]

**Supplementary Table S8****Multivariate analysis of clinicopathological characteristics, BCSS endpoint**

| Characteristic            | Uppsala (n=233) |             |                | Stockholm (n=113) |              |                |
|---------------------------|-----------------|-------------|----------------|-------------------|--------------|----------------|
|                           | HR              | 95% CI      | <i>P</i> value | HR                | 95% CI       | <i>P</i> value |
| ER*                       | 0.54            | 0.25 – 1.16 | 0.11           | 0.30              | 0.08 – 1.15  | 0.08           |
| PR*                       | 1.58            | 0.73 – 3.42 | 0.24           | 2.25              | 0.88 – 5.77  | 0.09           |
| Age <sup>†</sup>          | 0.92            | 0.54 – 1.57 | 0.75           | 0.71              | 0.30 – 1.64  | 0.42           |
| Tumour size <sup>‡</sup>  | 2.39            | 1.31 – 4.37 | 0.005          | 1.52              | 0.64 – 3.61  | 0.34           |
| Elston grade <sup>§</sup> | 1.41            | 0.65 – 3.05 | 0.39           | 2.77              | 0.60 – 12.85 | 0.20           |
| Nodal status <sup>¥</sup> | 2.31            | 1.39 – 3.84 | 0.001          | 1.19              | 0.52 – 2.75  | 0.68           |
| Ki67 <sup>¥</sup>         | 1.71            | 0.98 – 2.98 | 0.06           | 2.5               | 0.87 – 7.20  | 0.09           |

HR= Hazard ratio, CI= Confidence interval

\*ER; PR positive vs. negative

<sup>†</sup>Age <50 vs. ≥50

<sup>‡</sup>Size <20 vs. ≥20

<sup>§</sup>Grade I vs. II and III

<sup>¥</sup>Nodal status, negative vs. positive

<sup>¥</sup>Ki67 <10 vs. ≥10 Uppsala, <8 vs. ≥8 Stockholm
