# Supplementary material
Source: PubMed Central journal article supplement (PMC5528643)
Supplement: MOL2-8-741-s019.pdf [file MOL2-8-741-s019.pdf]

**Supplementary Table S9**

**Ki67 vs. gene expression signatures in Cox bivariate analysis, BCSS endpoint, Uppsala.**

| <b>Ki67 cutoff, &gt;=</b> | <b>10</b>   | <b>11</b>   | <b>12</b>   | <b>13</b>   | <b>15</b>   | <b>16</b>   | <b>20</b>   |
|---------------------------|-------------|-------------|-------------|-------------|-------------|-------------|-------------|
| <b>SIGNATURE</b>          |             |             |             |             |             |             |             |
| GGI (HR)                  | 1.39        | 1.54        | 1.49        | 1.48        | 1.57        | 1.66        | 2.01        |
| (95% CI)                  | (0.81-2.39) | (0.88-2.68) | (0.85-2.62) | (0.84-2.61) | (0.84-2.9)  | (0.90-3.06) | (1.12-3.61) |
| Ki67 (HR)                 | 2.03        | 1.62        | 1.68        | 1.69        | 1.46        | 1.34        | 0.99        |
| (95% CI)                  | (1.11-3.69) | (0.90-2.91) | (0.93-3.03) | (0.94-3.01) | (0.79-2.70) | (0.73-2.47) | (0.54-1.82) |
| 70-gene                   | 1.35        | 1.50        | 1.47        | 1.47        | 1.55        | 1.64        | 1.94        |
|                           | (0.77-2.37) | (0.84-2.68) | (0.82-2.62) | (0.83-2.61) | (0.84-2.85) | (0.88-3.05) | (1.1-3.44)  |
| Ki67                      | 2.03        | 1.61        | 1.68        | 1.69        | 1.47        | 1.34        | 1.02        |
|                           | (1.11-3.74) | (0.89-2.94) | (0.93-3.03) | (0.95-3.0)  | (0.81-2.67) | (0.73-2.45) | (0.57-1.83) |
| p53                       | 1.16        | 1.25        | 1.22        | 1.19        | 1.18        | 1.21        | 1.52        |
|                           | (0.68-1.98) | (0.73-2.16) | (0.71-2.11) | (0.68-2.08) | (0.64-2.15) | (0.64-2.28) | (0.81-2.87) |
| Ki67                      | 2.26        | 1.85        | 1.92        | 1.94        | 1.79        | 1.66        | 1.20        |
|                           | (1.28-4.0)  | (1.06-3.22) | (1.11-3.34) | (1.12-3.37) | (0.99-3.21) | (0.90-3.08) | (0.63-2.27) |
| RS *                      | 2.01        | 2.11        | 2.07        | 2.05        | 2.12        | 2.19        | 2.41        |
|                           | (1.01-3.71) | (1.14-3.91) | (1.12-3.85) | (1.1-3.83)  | (1.13-4.0)  | (1.16-4.12) | (1.30-4.49) |
| Ki67                      | 1.97        | 1.63        | 1.66        | 1.65        | 1.46        | 1.37        | 1.12        |
|                           | (1.15-3.39) | (0.97-2.74) | (0.99-2.79) | (0.99-2.74) | (0.88-2.43) | (0.83-2.28) | (0.66-1.87) |
| RS §                      | 1.33        | 1.41        | 1.37        | 1.36        | 1.37        | 1.42        | 1.69        |
|                           | (0.8-2.22)  | (0.84-2.38) | (0.81-2.33) | (0.8-2.32)  | (0.77-2.44) | (0.78-2.58) | (0.96-2.96) |
| Ki67                      | 2.14        | 1.75        | 1.81        | 1.81        | 1.61        | 1.49        | 1.13        |
|                           | (1.22-3.75) | (1.02-3.03) | (1.05-3.13) | (1.06-3.11) | (0.91-2.85) | (0.82-2.7)  | (0.63-2.01) |
| Sorlie ¥                  | 1.16        | 1.25        | 1.23        | 1.20        | 1.24        | 1.30        | 1.64        |
|                           | (0.68-1.97) | (0.73-2.16) | (0.70-2.14) | (0.68-2.14) | (0.66-2.32) | (0.67-2.53) | (0.90-3.0)  |
| KI67                      | 2.11        | 1.72        | 1.74        | 1.73        | 1.55        | 1.41        | 1.0         |
|                           | (1.17-3.80) | (0.97-3.05) | (0.97-3.09) | (0.96-3.1)  | (0.83-2.9)  | (0.72-2.75) | (0.53-1.89) |
| Sorlie §                  | 1.53        | 1.6         | 1.58        | 1.56        | 1.6         | 1.63        | 1.81        |
|                           | (0.92-2.53) | (0.97-2.66) | (0.95-2.64) | (0.93-2.62) | (0.94-2.72) | (0.95-2.8)  | (1.07-3.06) |
| KI67                      | 2.02        | 1.69        | 1.69        | 1.65        | 1.49        | 1.39        | 1.13        |
|                           | (1.17-3.47) | (1.0-2.84)  | (1.0-2.83)  | (0.98-2.77) | (0.89-2.51) | (0.82-2.36) | (0.66-1.93) |
| Sorlie †                  | 1.92        | 1.96        | 1.94        | 1.92        | 1.98        | 2.02        | 2.18        |
|                           | (1.1-3.33)  | (1.13-3.42) | (1.11-3.4)  | (1.01-3.38) | (1.13-3.48) | (1.15-3.55) | (1.26-3.79) |
| KI67                      | 2.04        | 1.71        | 1.70        | 1.67        | 1.54        | 1.46        | 1.25        |
|                           | (1.20-3.48) | (1.02-2.85) | (1.02-2.84) | (1.01-2.76) | (0.94-2.53) | (0.89-2.4)  | (0.75-2.07) |
| Hu ¥                      | 1.38        | 1.54        | 1.48        | 1.46        | 1.58        | 1.67        | 1.93        |
|                           | (0.79-2.41) | (0.87-2.71) | (0.82-2.65) | (0.8-2.66)  | (0.87-2.88) | (0.9-3.07)  | (1.11-3.36) |
| KI67                      | 2.02        | 1.61        | 1.66        | 1.66        | 1.46        | 1.33        | 1.06        |
|                           | (1.1-3.7)   | (0.9-2.89)  | (0.91-3.03) | (0.91-3.04) | (0.81-2.63) | (0.73-2.43) | (0.6-1.86)  |
| Hu ‡                      | 2.14        | 2.23        | 2.19        | 2.17        | 2.28        | 2.32        | 2.47        |
|                           | (1.31-3.5)  | (1.36-3.66) | (1.33-3.61) | (1.31-3.6)  | (1.39-3.73) | (1.41-3.8)  | (1.53-4.01) |
| KI67                      | 1.98        | 1.66        | 1.68        | 1.66        | 1.57        | 1.5         | 1.33        |
|                           | (1.15-3.39) | (0.99-2.77) | (1.0-2.81)  | (1.0-2.76)  | (0.97-2.57) | (0.92-2.45) | (0.81-2.18) |
| Parker ¥                  | 1.74        | 1.93        | 1.89        | 1.88        | 2.02        | 2.11        | 2.38        |
|                           | (0.98-3.11) | (1.08-3.46) | (1.05-3.41) | (1.02-3.45) | (1.1-3.68)  | (1.16-3.85) | (1.35-4.2)  |
| Ki67                      | 1.81        | 1.45        | 1.49        | 1.47        | 1.31        | 1.21        | 0.97        |
|                           | (1.0-3.33)  | (0.82-2.58) | (0.84-2.65) | (0.83-2.62) | (0.75-2.29) | (0.69-2.11) | (0.56-1.68) |
| Parker ‡                  | 2.19        | 2.28        | 2.24        | 2.22        | 2.3         | 2.35        | 2.5         |
|                           | (1.34-3.57) | (1.39-3.73) | (1.37-3.68) | (1.35-3.67) | (1.4-3.79)  | (1.43-3.85) | (1.54-4.04) |
| KI67                      | 1.95        | 1.62        | 1.64        | 1.61        | 1.5         | 1.44        | 1.27        |
|                           | (1.14-3.33) | (0.97-2.71) | (0.98-2.75) | (0.97-2.68) | (0.92-2.46) | (0.88-2.35) | (0.77-2.09) |

RS\*=low vs. rest, RS§=high vs. rest; Sorlie¥= normal-like and luminal A vs. rest, Sorlie§= normal-like, luminal A and basal vs. rest, Sorlie†= normal-like, luminal A, basal and HER2-like vs. luminal B; Hu¥= normal-like and luminal A vs. rest, Hu‡= normal-like, luminal A and basal vs. rest; Parker¥= normal-like and luminal A vs. rest, Parker‡= normal-like, luminal A and basal vs. rest.
